1 **Title**

2 pH effect on strain-specific transcriptomes of the take-all fungus

3

4

5 **Running Title**

6 pH effect on transcriptome in fungal strains

7

8

9 **Authors**

10 Kévin GAZENGEL <sup>1\*</sup>, Lionel LEBRETON <sup>1</sup>, Nicolas LAPALU <sup>2</sup>, Joëlle AMSELEM <sup>3</sup>,  
11 Anne-Yvonne GUILLERM-ERCKELBOUDT <sup>1</sup>, Denis TAGU <sup>1</sup>, Stéphanie DAVAL<sup>1</sup>

12 <sup>1</sup> Agrocampus Ouest, INRAE, Université de Rennes, IGEPP, F-35650 Le Rheu, France

13 <sup>2</sup> AgroParisTech, INRAE, Université Paris-Saclay, BIOGER, F-78850 Thiverval-Grignon,  
14 France

15 <sup>3</sup> INRAE, Université Paris-Saclay, URGI, F-78026 Versailles, France

16 \* Correspondence: E-mail: kevin.gazengel@inrae.fr

17 Tel: +33 2 23 48 70 78

18 Fax: +33 2 23 48 51 80

19

21 **Author contributions**

| <b>Contributor Role</b>                     | <b>Role Definition</b>                                                                                             |
|---------------------------------------------|--------------------------------------------------------------------------------------------------------------------|
| <b>Conceptualization</b>                    | Stéphanie DAVAL                                                                                                    |
| <b>Data Curation</b>                        | Joëlle AMSELEM, Kévin GAZENGEL, Nicolas LAPALU                                                                     |
| <b>Formal Analysis</b>                      | Kévin GAZENGEL, Lionel LEBRETON                                                                                    |
| <b>Funding Acquisition</b>                  | Stéphanie DAVAL, Denis TAGU                                                                                        |
| <b>Investigation</b>                        | Stéphanie DAVAL, Kévin GAZENGEL, Anne-Yvonne GUILLERM-ERCKELBOUDT, Lionel LEBRETON                                 |
| <b>Methodology</b>                          | Kévin GAZENGEL, Anne-Yvonne GUILLERM-ERCKELBOUDT, Lionel LEBRETON                                                  |
| <b>Project Administration</b>               | Stéphanie DAVAL                                                                                                    |
| <b>Resources</b>                            | Joëlle AMSELEM, Stéphanie DAVAL, Kévin GAZENGEL, Anne-Yvonne GUILLERM-ERCKELBOUDT, Nicolas LAPALU, Lionel LEBRETON |
| <b>Software</b>                             | Joëlle AMSELEM, Kévin GAZENGEL, Nicolas LAPALU                                                                     |
| <b>Supervision</b>                          | Stéphanie DAVAL                                                                                                    |
| <b>Validation</b>                           | Joëlle AMSELEM, Stéphanie DAVAL, Nicolas LAPALU                                                                    |
| <b>Visualization</b>                        | Stéphanie DAVAL, Kévin GAZENGEL                                                                                    |
| <b>Writing – Original Draft Preparation</b> | Stéphanie DAVAL, Kévin GAZENGEL                                                                                    |
| <b>Writing – Review &amp; Editing</b>       | Joëlle AMSELEM, Stéphanie DAVAL, Kévin GAZENGEL, Nicolas LAPALU, Lionel LEBRETON, Denis TAGU                       |

23 **Abstract**

24 The soilborne fungus *Gaeumannomyces graminis* var. *tritici* (*Ggt*) causes the take-all disease  
25 on wheat roots. Ambient pH has been shown to be critical in different steps of *Ggt* life cycle  
26 such as survival in bulk soil, saprophytic growth, and pathogenicity on plants. There are  
27 however intra-specific variations and we previously found two types of *Ggt* strains that grow  
28 preferentially either at acidic pH or at neutral/alkaline pH; gene expression involved in pH-  
29 signal transduction pathway and pathogenesis was differentially regulated in two strains  
30 representative of these types. To go deeper in the description of the genetic pathways and the  
31 understanding of this adaptative mechanism, transcriptome sequencing was achieved on two  
32 strains (PG6 and PG38) which displayed opposite growth profiles in two pH conditions  
33 (acidic and neutral). PG6, growing better at acidic pH, overexpressed in this condition genes  
34 related to energy production and protein deubiquitination. In contrast, PG38, which grew  
35 better at neutral pH, overexpressed in this condition genes involved in fatty acids metabolism.  
36 This strain also expressed stress resistance mechanisms at both pH, to assert a convenient  
37 growth under various ambient pH conditions. These differences in metabolic pathway  
38 expression between strains at different pH might buffer the effect of field or soil variation in  
39 wheat fields, and explain the success of the pathogen.

40

41 Keywords : *Gaeumannomyces graminis* var. *tritici*, RNA-seq, *in vitro* assay, stress response,  
42 GO-terms, pH depending growth

43 **INTRODUCTION**

44

45 The filamentous fungus *Gaeumannomyces graminis* var. *tritici* (*Ggt*) is an ascomycete of  
46 large economic importance due to its devastating impact on cereal plants in temperate  
47 climates. The take-all disease caused by this fungus affects the roots of the host plants by  
48 blocking the conductive tissues and reducing water uptake. Serious infections under favorable  
49 conditions can result in decreased yields of up to 40%-60% [1].

50 *Ggt* populations are divided into two major genetically different groups (G1 and G2)  
51 which are known to coexist at the field scale in pluri-annual wheat monoculture experiments  
52 [2]. Ratios of G1 to G2 are different due to wheat crop history and disease level. G1 strains  
53 are more frequent in the first year of wheat monoculture, whereas G2 strains increase and  
54 reach a peak after three to five years corresponding to the maximum of take-all symptoms [3].  
55 Furthermore, *in vitro* plant assays showed that G2 strains are slightly more aggressive than  
56 the G1 [4].

57 As most of soilborne pathogenic fungi, *Ggt* developed strategies to adapt to the ambient  
58 environmental factors all along its life cycle: survival in bulk soil, hyphal growth in soil  
59 during the saprophytic phase, and infection of host plants during pathogenic phase. This is  
60 particularly true concerning the pH factor. Soil pH is a factor influencing the take-all severity,  
61 whether modified by nitrogen supply [5] or by microbial communities interacting with *Ggt*  
62 and wheat [6], leading to a more acidic rhizosphere unfavorable to *Ggt* [7]. As a consequence,  
63 the pH- signaling pathway (Pal), characteristic of the fungal kingdom, has been shown to  
64 operate in *Ggt* [8]. This Pal pathway, first identified in *Aspergillus nidulans* [9], is composed  
65 of six proteins (palA, palB, palC, palF, palH, palI) which conduct pH signal to the  
66 transcription factor pacC [10]. Three forms of pacC exist: the inactive full-length pacC form  
67 predominates in acidic conditions whereas, in neutral-to-alkaline conditions, two proteolytic  
68 cleavages (the first one pH-dependent) enable pacC to be functional as a repressor of acid-  
69 expressed genes and an activator of neutral-to-alkaline-expressed genes [10].

70 Within *Ggt* species, evidence of intraspecific variability in pH sensitivity was  
71 demonstrated: some strains grew better at neutral pH and other at acidic pH [11]. More  
72 precisely, G1 and G2 strains are known to respond differently to the pH factor: whereas G1  
73 and G2 strains have similar growth rate profile on acidic medium, G2 strains present a  
74 significantly better growth rate on neutral medium [11]. The mechanisms underlying the  
75 differential response of *Ggt* strains to the pH variations of the environment are not yet

76 elucidated but extracellular pH has been shown to regulate *Ggt* gene expression involved in  
77 pathogenesis and saprophytic growth [8], in an original strain-specific way. Thus, the  
78 transcription factor *pacC* has been suspected to potentially play a role in pathogenesis through  
79 the regulation of expression of some pathogenesis-related genes that contained *pacC* binding  
80 sites (5'-GCCARG-3'). This is true for *Penicillium Expansum* and *Penicillium digitatum* in  
81 which *pacC* mutants are affected in their pathogenicity towards pear/apple and citrus fruits,  
82 respectively [12,13]. The ability of strains within the *Ggt* species to fine tune gene expression  
83 in response to the soil pH could affect growth rate leading to diverse (i) capacity of  
84 saprophytic growth (survival and development in bulk soil), (ii) capacity of surface roots'  
85 colonization (first part of the pathogenic phase), and (iii) capacity of penetrating the roots  
86 (infection phase).

87 The aim of this study is to decipher *Ggt* gene expression regulation mechanisms involved  
88 in pH perception and to test the hypothesis of the link between pH perception and growth  
89 ability in the saprophytic growth and colonization of roots surface. Herein, two *Ggt* strains  
90 (PG6 and PG38), differing in their growth profile in function of the ambient pH and their  
91 group (G1 for PG6 and G2 for PG38), were selected and used for a RNA-Seq analysis under  
92 acidic or neutral pH conditions: pH 4.6 to mimick the value commonly found in soils and  
93 known to be unfavorable to *Ggt* [14], and pH 7.0 known as the optimal value for *Ggt* [5,15].  
94 By this transcriptomics analysis, we showed that major metabolic and physiological changes  
95 associated with ambient pH and with pH-dependent growth of two strains occurred, and a  
96 focus was performed on the differentially expressed genes (DEGs) potentially involved in pH-  
97 dependent growth ability.

98

## 99 **MATERIALS AND METHODS**

100

### 101 **Fungal strains and culture conditions**

102 *Ggt* strains used in this study (**Table 1**) were stored as potato dextrose agar (PDA)  
103 explants immersed in 10% glycerol at 4°C for long-term preservation. Prior to inoculation,  
104 each strain was cultured twice for 7 days at 20°C in the dark on autoclaved non-buffered (pH  
105 5.6) Fåhraeus medium [16], the composition of which is described in the **S1 Table** [8]. Two  
106 Fåhraeus media buffered at pH 4.6 (A for acidic pH) or 7.0 (N for neutral pH), with different  
107 ratios of citrate / phosphate solutions (**S1 Table**), were then used for fungal mycelium growth  
108 measurement. pH was checked in all the media after autoclaving (115°C, 20 min). An Isopore

109 0.22  $\mu\text{m}$  pore-size sterile membrane (Millipore, Molsheim, France) was laid on the agar  
110 surface to force mycelium to grow on top of the medium and to facilitate its sampling for  
111 further RNA extractions. Five mm diameter plugs of mycelium were removed from the edge  
112 of a colony grown twice the non-buffered medium. One plug per plate was laid on buffered  
113 Fåhraeus media (A or N), in the centre of Petri dishes, and the plates, covered by the  
114 polycarbonate filter, were incubated for 7 days at 20°C in the dark. Two orthogonal diameters  
115 of the colony were measured in each condition 7 days after inoculation. For each pH  
116 condition and strain, three plates were used, and three independent experiments were  
117 performed. Mycelium growth was compared using the Wilcoxon rank sum test.

118 **Table 1. Origin of *Gaeumannomyces graminis* var. *tritici* isolates used in this study.**

| Isolate | Original nomenclature | Molecular characterization (G1/G2) | Geographical origin / Isolation date | Source or reference       | Host of origin |
|---------|-----------------------|------------------------------------|--------------------------------------|---------------------------|----------------|
| PG6     | 1125-6                | G1                                 | Germany / 1997                       | Monsanto collection       | Wheat          |
| PG38    | 82/02                 | G2                                 | France (Pacé) / 2002                 | Lebreton et al., 2007 [3] | Wheat          |

119

### 120 **RNA extraction from fungal mycelium grown on buffered media**

121 After incubation at 20°C for 7 days, all the mycelium grown on polycarbonate membrane  
122 was collected. The mycelia from 3 plates were pooled and ground to powder with a pestle in  
123 liquid nitrogen-chilled mortars with Fontainebleau sand. Total RNA was extracted in 1 mL of  
124 Trizol (Invitrogen, Paisley, UK) and contaminating DNA was removed by using the RNase-  
125 free RQ1 DNase (Promega Corp., Madison, WI, USA) according to the manufacturer's  
126 instructions. The RNA purity and quality were assessed with a Bioanalyser 2100 (Agilent  
127 Tech. Inc., La Jolla, CA, USA) and quantified with a Nanodrop (Agilent).

128

### 129 **Library construction, RNA-sequencing, and quality control**

130 For each of the twelve samples (2 strains \* 2 pH conditions \* 3 biological replicates),  
131 sequencing libraries were generated using 2  $\mu\text{g}$  of total RNA per sample with the TruSeq  
132 RNA sample preparation protocol from Illumina according to the manufacturer's  
133 recommendations. Tags were added to each sample for identification. The sequencing  
134 reaction was performed using the Illumina HiSeq v3 chemistry on a HiSeq 2000 in 100 bp  
135 single read run according to the manufacturers recommendations (GATC Biotech, Konstanz,  
136 Germany). Sequence data quality control was evaluated using the FastQC program. Adapter  
137 sequences were removed using Flexbar, and Sickle was used to clean bases with substandard  
138 quality (PHRED 28) before removing reads under thirty bases length. Raw reads are available

139 at the European Nucleotide Archive database system under the project accession number  
140 PRJEB34060.

141

### 142 **Read mapping to the reference genome and transcript counting**

143 STAR v2.5.2a\_modified [17] was used to align the reads to the published genome of *Ggt*  
144 strain ([https://fungi.ensembl.org/Gaeumannomyces\\_graminis/Info/Index](https://fungi.ensembl.org/Gaeumannomyces_graminis/Info/Index)). This available  
145 reference sequenced genome is from the R3-111a-1 *Ggt* strain, different from the strains used  
146 in our study [15,18]. FeatureCounts v1.6.0 [19] was used to count the number of reads on  
147 each annotated *Ggt* gene, giving the raw counts. Genes with low count levels (under 1 count  
148 per million of mapped reads in three samples at least) were removed from the data.

149

### 150 **Differential expression analysis and gene clustering**

151 DESeq2 R package [20] was used to product lists of DEGs between two experimental  
152 conditions. This program has its own normalization method “Relative Log Expression” (RLE)  
153 and needs to have raw counts as input. The p-values were adjusted to control multiple testing  
154 using the Benjamini and Hochberg’s method. Genes with an adjusted p-value < 0.05 were  
155 considered as significantly differentially expressed between conditions.

156 The clustering of gene expression profiles was performed using HTScluster R package  
157 [21] by making groups of co-expressed genes on the DESeq2 normalized counts.

158

### 159 **Gene Ontology term (GO-term) enrichment**

160 GO enrichment analysis of DEGs was achieved with TopGO R package [22] using  
161 weight01 algorithm, Fisher's exact statistic test and a nodeSize parameter set to 5 (to remove  
162 enriched GO-term with less than five genes in the genome). GO-terms for each gene were  
163 first imported from BioMart database (Ensembl Fungi) via Blast2GO software  
164 (<https://www.blast2go.com>). For each GO category (Molecular Function, Cellular Component  
165 and Biological Process), Top 10 Enriched GO-terms (p-value < 0.05), enrichment ratios (> 5),  
166 and number of genes under each enriched GO-term were represented using ggplot2 R  
167 package.

168

169

170

171

## 172 **Quantitative real-time PCR (qRT-PCR) validation**

173 The expression levels of 8 selected DEGs were determined by qRT-PCR to confirm the  
174 results of RNA-Seq analysis. Total RNA from *Ggt* mycelium was reverse transcribed with a  
175 set of two external RNA quality controls as previously described [8,23]. Briefly, for all the  
176 strains and the pH conditions, 750 ng of total RNA from fungi were mixed with known  
177 quantities of the two external controls. Reverse transcription was carried out in 30  $\mu$ L  
178 containing 375 ng of random primers, 1 X ImPromII reaction buffer, 3 mM MgCl<sub>2</sub>, 125  $\mu$ M  
179 of each dNTP, 30 U of RNasin Ribonuclease Inhibitor and 1.5  $\mu$ L of ImProm-II™ (Promega).  
180 The following parameters were applied: 5 min at 25°C, 1 h at 42°C and 15 min at 70°C.  
181 Reactions without RNA or without reverse transcriptase were performed as negative controls.  
182 The oligonucleotides designed with the Primer 3 software are described in **S2 Table**.  
183 Quantitative PCR reactions (20  $\mu$ L) containing 1  $\mu$ L of cDNA, 0.4  $\mu$ M of each primer and 1 X  
184 SybrGreen I Master (Roche) were performed on the LightCycler® 480 Real-Time PCR  
185 System (Roche). The quantitative PCR profile consisted of an initial denaturation at 95°C for  
186 5 min, followed by 45 cycles of 95°C for 15 sec and hybridization-elongation temperature for  
187 40 sec (**S2 Table**). A dissociation stage was applied at the end of the PCR to assess that each  
188 amplicon generated was specific. Moreover, each specific amplicon was sequenced  
189 (Genoscreen, Lille, France) to confirm it corresponds the expected sequence. The expression  
190 levels of transcripts were normalized using external RNA controls [23,24] from three  
191 independent biological replicates, each with three technical PCR replicates. Data were  
192 analyzed using the ANOVA procedure of the R statistical analysis software.

193

## 194 **RESULTS AND DISCUSSION**

195

### 196 **Effect of pH on growth**

197 The two *Ggt* strains (PG6 and PG38) were grown on media buffered at pH 4.6 (A) or 7.0  
198 (N) in the dark. After 7 days, two orthogonal diameters of the colony were measured in each  
199 condition (**Fig 1**). Both strains grow at both pH levels but displayed two different growth  
200 profiles. PG6 showed a significantly higher mycelium growth at the acidic pH compared to  
201 the neutral condition. On the contrary, PG38 grew significantly better in a neutral medium  
202 than in an acidic environment. These growth rate profiles are representative of the  
203 interspecific variability of *Ggt* populations [8,11]. The growth profiles were different between



204 strains according to the pH making relevant the study of the molecular basis regulating these  
205 two distinct phenotypes.

206

207 **Fig 1. Mycelium growth of *Ggt* strains as a function of medium pH.**

208 PG6 and PG38 *Ggt* strains were grown at 20°C in the dark on media buffered at pH 4.6 (A) or 7.0 (N). The *Ggt*  
209 plugs were laid on medium covered with a polycarbonate filter allowing the mycelium sampling. The colony  
210 diameters were measured after 7 days of incubation. Each value is the mean of three biological replicates and  
211 three technical replicates. Error bars represented standard errors of the means. Conditions with different letters  
212 were statistically different according to the Wilcoxon rank sum test ( $P < 0.05$ ). Strains were depicted on the x-axis  
213 and fungal growth diameter in mm was on the y-axis.

214

215 **Overview, mapping and counting of the RNA-Seq data**

216 RNA-Seq expression profiling was performed on the two strains (PG6 and PG38)  
217 growing on two different pH (4.6 or 7.0). The three biological replicates of each condition  
218 were sequenced in one pool of 12 tagged libraries on an Illumina HiSeq 2000 in 100 bases  
219 single-read mode. From 11,956,072 to 20,507,372 raw reads were obtained per sample (**Table**  
220 **2**). After removing adapters and low quality bases ( $< Q28$ ), 91.0 to 92.6% of the raw reads  
221 were kept with a minimum of length set to 30 bases. Thus, a total of 10,957,477 to 18,783,248  
222 cleaned reads per sample were generated from the different RNA libraries. After read  
223 trimming, 78.2 to 86.1% of the initial raw data were uniquely mapped to the *Ggt* genome.  
224 Reads with multiple location (0.2 to 1.0 %) and too short alignments (6.0 to 13.3%) were  
225 removed. At the end, 70.2 to 78.5% of the raw reads were kept. We removed the raw counts  
226 with less than one count per million of reads in at least three samples. We kept 11,041 genes  
227 among the 14,744 contained in the *Ggt* genome. Thus, the accuracy and quality of the  
228 sequencing data were sufficient for further analysis

229

230

231

232

233

234

235

236

237

238

239 **Table 2. Overview of number of raw, cleaned, mapped, and counted reads from the different samples.**  
240

| Sample name | Library for each replicate | Number of total raw reads | Reads after cleaning and trimming (I30, q28) |                                              |      |                                      |      |
|-------------|----------------------------|---------------------------|----------------------------------------------|----------------------------------------------|------|--------------------------------------|------|
|             |                            |                           | Number of cleaned reads                      | Number of uniquely mapped reads <sup>1</sup> | %    | Number of counted reads <sup>2</sup> | %    |
| PG6 / A     | 1                          | 15,659,005                | 14,506,452                                   | 12,640,293                                   | 80.7 | 11,430,087                           | 73.0 |
|             | 2                          | 12,994,429                | 11,874,270                                   | 10,225,348                                   | 78.7 | 9,126,369                            | 70.2 |
|             | 3                          | 15,355,211                | 14,211,595                                   | 12,249,379                                   | 79.8 | 10,991,518                           | 71.6 |
| PG6 / N     | 1                          | 19,466,804                | 17,734,183                                   | 15,223,234                                   | 78.2 | 13,666,878                           | 70.2 |
|             | 2                          | 16,798,714                | 15,407,637                                   | 13,261,468                                   | 78.9 | 12,039,586                           | 71.7 |
|             | 3                          | 17,529,036                | 16,035,463                                   | 13,869,536                                   | 79.1 | 12,636,834                           | 72.1 |
| PG38 / A    | 1                          | 17,641,336                | 16,047,490                                   | 14,867,129                                   | 84.3 | 13,654,777                           | 77.4 |
|             | 2                          | 17,583,033                | 16,111,331                                   | 15,082,270                                   | 85.8 | 13,762,219                           | 78.3 |
|             | 3                          | 14,107,598                | 12,956,289                                   | 12,150,819                                   | 86.1 | 11,071,449                           | 78.5 |
| PG38 / N    | 1                          | 20,507,372                | 18,783,248                                   | 17,241,029                                   | 84.1 | 15,636,718                           | 76.2 |
|             | 2                          | 17,616,201                | 16,206,580                                   | 15,024,729                                   | 85.3 | 13,707,008                           | 77.8 |
|             | 3                          | 11,956,072                | 10,957,477                                   | 9,938,207                                    | 83.1 | 9,012,954                            | 75.4 |

241

242 The percentages are given from initial raw reads.

243

<sup>1</sup> Total number of reads mapped to uniquely locations in the *Ggt* genome with STAR

244

<sup>2</sup> Total number of reads counted with FeatureCounts

245

A: acidic pH and N: neutral pH

246

## 247 **Validation and clustering of the RNA-Seq data**

248 We looked for differential gene expression between the different samples and normalized  
249 DESeq2 counts of all samples were plotted on a PCA to estimate the variability of the  
250 experiments and the biological conditions (**Fig 2**). 86% of the variance was represented on the  
251 plot. We confirmed that the three replicates of each experimental condition were largely  
252 clustered together, which validate our RNA-Seq experiment. The x-axis (57%) separated  
253 clearly the two strains whereas the y-axis (29%) was representative of the pH effect.

254

255 **Fig 2. Estimation of biological variations by a Principal Component Analysis of the 12 transcript profiles.**

256

X-axis represented the variance on the first axis of the PCA, and the second was pictured on the y-axis.

257

A: acidic pH and N: neutral pH

258

259 As biological replicates were homogeneous, gene expression level of the four  
260 experimental conditions was calculated based on the means of the three replicates of each  
261 biological condition (**Fig. 3**). Expression profiles were clearly different between conditions,  
262 identifying groups of up-regulated (red) and down-regulated (green) genes. Gene expression  
263 was affected by the pH and/or by the strain. A clear separation was seen first between the  
264 strains, and secondly between pH inside each strain.

265

266

267 **Fig 3. Overview of gene expression.**

268 Gene expression levels were displayed from green (downregulated) to red (upregulated). Colored bars on the left  
269 of the heatmap mark distinct major branches in the clustering tree grouping genes with similar expression pattern.  
270 Each row corresponded to a single gene and each column to the mean of the three biological repetitions of one  
271 experimental condition. The heatmap was generated with scripts based on heatmap.2 function as available in the  
272 "gplots" R package.

273 A: acidic pH and N: neutral pH

274

275 In order to better characterize the different expression profiles of the expressed genes, we  
276 performed a co-expression clustering analysis based on Poisson Mixture models [21]. The  
277 analysis described 6 different profiles (**Fig. 4**). One profile (cluster 1) showed genes with  
278 strong expression in PG6, especially at acidic pH (1,167 genes) and another profile (cluster 2)  
279 showed genes with high expression in PG38 at neutral pH (445 genes). Both clusters 1 and 2  
280 were representative of the higher growth rates of both strains according to pH. On the  
281 contrary, clusters 3 (1,168 genes) and 4 (503 genes) depicted the genes expressed in PG38  
282 and PG6, respectively, in the pH where their growth were the lowest. In addition, clusters 2,  
283 4, and 6 depicted genes more expressed at neutral pH compared to acidic pH: 445 genes  
284 highly expressed in PG38 compared to PG6 (cluster 2), 503 genes, including *pacC*, highly  
285 expressed in PG6 compared to PG38 (cluster 4), and 3,034 genes with similar expression in  
286 both strains (cluster 6). As the transcription factor *pacC* is known to repress acid-expressed  
287 genes and to induce neutral-to-alkaline expressed genes [10], the presence of *pacC* in the  
288 cluster 4 confirmed the activation of pH-signaling pathway at neutral pH in our study. The  
289 clusters 3 and 5 were more homogeneous between samples whereas cluster 3 showed genes  
290 globally more expressed in PG38 and cluster 5 in PG6 (4,724 genes). Interestingly, the  
291 clusters 3 and 5 contained the expression of the different *pal* genes confirming the expression  
292 of this pH-signaling pathway in *Ggt* [8].

293

294 **Fig 4. Co-expression clusters.**

295 HTScluster was used to cluster expression data with Poisson Mixture Models. The number of genes assigned to  
296 a particular cluster was indicated below the cluster name. Grey and white backgrounds were for acidic and neutral  
297 pH, respectively. Each of the 12 samples was depicted on the x-axis and each biological condition (three  
298 replicates) was on the top of the curves. Y-axis represented, for each gene, the number of counts divided by the  
299 total number of counts in all the samples (frequency).

300 A: acidic pH and N: neutral pH

301

302

303 Finally, the clusters summarized well the different biological growth profiles that took  
304 place according to the strains and the pH, as described in the **Fig 1**, making relevant the study  
305 of transcriptional profiles in relation to growth phenotypes.

306

### 307 **Overall comparison of differentially expressed genes (DEGs)**

308 After DESeq2 normalization, four main comparisons biologically relevant were  
309 performed: 3,269 genes were differentially expressed between PG6A and PG6N conditions,  
310 3,874 between PG6A and PG38A, 3,171 between PG38A and PG38N, and 3,651 between  
311 PG6N and PG38N (**Set Size on Fig. 5**). Each of these DEGs lists contained a similar number  
312 of genes and represented from 21.5 to 26.3% of the total number of genes of the *Ggt* genome.  
313 Among these lists, 605 genes were specific (not found in other comparisons) of the  
314 PG6A/PG6N comparison (**blue arrows on Fig. 5**), 655 of the PG6A/PG38A contrast (**red**  
315 **arrows on Fig. 5**), 544 of the PG38A/PG38N contrast (**green arrows on Fig. 5**), and 541 of  
316 the PG6N/PG38N contrast (**orange arrows on Fig. 5**). Among these four last lists, the  
317 percentages of up-regulated and down-regulated were similar and the total number of specific  
318 DEGs represented from 3.7 to 4.4% of the total number of genes included in the *Ggt* genome.

319

### 320 **Fig 5. Plot of intersections between sets of genes differentially expressed.**

321 The intersected lists of differentially expressed genes and their sizes (number of DEGs) were presented in the  
322 horizontal bars on the left. The connected lines among the lists represented their intersections. The vertical bars  
323 and associated numbers corresponded to specific overlap of DE gene sets. The legends of colored arrows were  
324 explained in the text. The significance of gene expression changes was inferred based on an adjusted p-value <  
325 0.05.

326 <: number of DEGs underexpressed in the first condition compared to the second.

327 >: number of DEGs overexpressed in the first condition compared to the second.

328 A: acidic pH and N: neutral pH

329

330 The UpSetR package was used to identify 798 genes specifically regulated between  
331 acidic and neutral pH whatever the strain (**black long arrows on Fig. 5 and Table 3**), and  
332 1,267 genes regulated between the two strains independently of the pH (**grey long arrows on**  
333 **Fig. 5 and Table 3**).

334

335

336

337

338 **Table 3. Number of DEGs according to strain (A) and pH (B).**

| <b>A</b> | Comparison                                   | Up / Down  | Number of DEGs |
|----------|----------------------------------------------|------------|----------------|
|          | PG6 compared to PG38<br>(1,267 genes)        | PG6 < PG38 | 542            |
|          |                                              | PG38 < PG6 | 725            |
| <b>B</b> | Comparison                                   | Up / Down  | Number of DEGs |
|          | Acidic pH compared to neutral<br>(798 genes) | A < N      | 492            |
|          |                                              | N < A      | 306            |

340  
341  
342  
343

<: number of DEGs underexpressed in first condition compared to the second.

A: acidic pH and N: neutral pH

344 As both studied factors (strain and pH) had an effect on *Ggt* transcriptome, the study  
345 focused on transcriptomics differences between strains whatever the pH (strain effect) on one  
346 hand, and on transcriptomics differences between pH whatever the strain (strain effect) on the  
347 other hand. Finally, to highlight mechanisms potentially involved in the specific ability of  
348 each strain to grow under favorite pH, the overexpressed genes for each strain in the pH  
349 condition they grew better were more specifically analyzed.

350

### 351 **Strain effect on the *Ggt* transcriptome whatever the pH**

352 To better understand how the transcriptome differed between the strains whatever the pH,  
353 a GO-term enrichment analysis was achieved with TopGO. Among the 1,267 DEGs linked to  
354 the strain effect (**grey long arrows on Fig. 5 and Table 3**), 542 and 725 were overexpressed  
355 in PG38 and PG6, respectively (**Table 3**). The **Fig. 6A and 6B** showed that 51 genes were  
356 involved in an enrichment of 27 significant GO-terms. Among these 27 enriched GO-terms  
357 related to the strain effect, 16 GO-terms were enriched in PG38 (**Fig. 6A**) and 11 in PG6 (**Fig.**  
358 **6B**).

359

### 360 **Fig 6. GO enrichment on DEGs lists according to strain or pH effects.**

361 Enrichment factor (> 5) was represented on the x-axis and enriched GO-terms were described on the y-axis.

362 (A) Genes linked to strain effect: under-expressed in PG6 compared to PG38

363 (B) Genes linked to strain effect: over-expressed in PG6 compared to PG38

364 (C) Genes linked to pH effect: under-expressed in acidic medium compared to neutral

365 (D) Genes linked to pH effect: over-expressed in acidic medium compared to neutral

366 BP = Biological Process, CC = Cellular Component and MF = Molecular Function

367

368 The GO-terms enriched in PG38 were involved in DNA repair and DNA replication  
369 mechanisms ('lagging strand elongation', 'replicative cell aging', 'base excision repair',

370 ‘DNA synthesis involved in DNA repair’, and ‘mitotic recombination’). The ‘base excision  
371 repair mechanism’ has been especially shown to be involved in host defense in the human  
372 pathogenic fungus *Paracoccidioides brasiliensis* [25]. The ‘2 iron, 2 sulfur cluster binding’  
373 term was essential to cell viability in *Saccharomyces Cerevisiae* via its implication in  
374 ribosome assembly, DNA damage repair, and DNA replication [26]. In addition, the  
375 ‘antibiotic catabolic process’ enriched GO-term in PG38 could take part of a global stress-  
376 signaling pathway and could, for example, explain a potential ability of this strain to resist to  
377 antibiotics synthesized by antagonists microorganisms in soils [6]. So whatever the pH, the  
378 PG38 seemed to apply DNA repair and stress resistance mechanisms which could be essential  
379 in survival during wheat intercrop and growth of *Ggt* in soils and on roots surface.

380 On the other side, the enriched GO-terms in PG6 were associated to mitochondrial  
381 inheritance, energy transfer, and energy production. For example ‘Arp2/3 complex’ was  
382 essential to mitochondrial material transport to daughter cells during mitosis [27,28]  
383 participating in nucleation of actin filaments. As this transport was also supported by  
384 microtubules, the enrichment of ‘spindle pole’ GO-term in PG6 could be important for  
385 mitochondrial transport by its action on microtubule organization. Finally, ‘ATPase activity’  
386 enriched in PG6, suggests an important role for energy transfer. In PG6, a large part of its  
387 metabolism seemed to be related to energy mechanisms potentially important for its growth  
388 whatever the pH.

389

### 390 **pH effect on the *Ggt* transcriptome whatever the strain**

391 In the same way, TopGO analysis enabled to identify GO-term enrichments in the genes  
392 overexpressed at a given pH compared to the other pH, whatever the strain. Among the 798  
393 genes previously described as linked to the pH effect (**black long arrows on Fig. 5 and**  
394 **Table 3**), 492 and 306 were respectively overexpressed in neutral and acidic environment.  
395 **Fig. 6C and 6D** showed that 53 genes of these DEGs were involved in the enrichment of 20  
396 significant GO-terms. Among these 20 enriched GO-terms linked to the pH effect, 11 GO-  
397 terms were enriched in neutral conditions (**Fig. 6C**) whatever the strain and 9 in acidic  
398 conditions (**Fig. 6D**).

399 Several enriched GO-terms in neutral conditions were linked to ‘V-ATPases’ and ‘proton  
400 transport’. These pathways have been demonstrated as involved in organelles acidification in  
401 cells in response to extracellular pH, with an overexpression at pH 7.0 in yeast cells [29] as  
402 for *Ggt* in this study. Under these enriched GO-terms, we found 5 genes (GGTG\_01849,

403 GGTG\_04071, GGTG\_06975, GGTG\_04610, and GGTG\_10757) expressed at the same level  
404 between conditions N and A in the two strains and displaying similar fold change (about 1.5)  
405 between neutral and acidic conditions. So both strains of our study seemed to be able, at the  
406 same level, to maintain pH-gradients in their cells and organelles when they grew on neutral  
407 medium. Enrichment of ‘ascospore wall assembly’ at neutral pH was also seen, suggesting an  
408 ability of both strains at this pH to form ascospores. As this ability is related to the sexual  
409 stage of *Ggt*, which is usually used to disperse at long distance or to resist to stresses, it could  
410 have an importance in dynamics of the take-all disease during wheat monocultures, in  
411 function of the ambient pH.

412 On the other side, the main enriched function at acidic pH was linked to ‘mitochondria  
413 transport and inheritance’ (GO-terms ‘mitochondrion distribution’, ‘mitochondrion  
414 inheritance’, and ‘microtubule’). As the mitochondria activity could affect various  
415 mechanisms such ATP production, cellular differentiation, or cell death [27,28], the role of  
416 these enriched genes needs to be elucidated.

417

#### 418 **Strain and pH effects on *Ggt* transcriptomes according to the growth profiles**

419 To understand more precisely the mechanisms potentially involved in the specific ability  
420 of each strain to grow on its favorite pH, we focused on genes overexpressed in each strain in  
421 the pH condition they grew better.

422 Thanks to a TopGO identification of enriched GO-terms among the 250 genes  
423 overexpressed in PG38 at neutral pH compared to acidic (**Fig. 7 A** and **green long arrow on**  
424 **Fig. 5**), 41 contributed to 15 GO-terms enrichment. A main part of the enriched GO-terms (9)  
425 was involved in fatty acid metabolism : ‘fatty acid transport’, ‘fatty acid catabolic process’,  
426 ‘monocarboxylic acid catabolic process’, ‘acyl-CoA metabolic process’, ‘peroxisomal part’,  
427 ‘integral component of peroxisomal membrane’, ‘thiolester hydrolase activity’, ‘CoA  
428 hydrolase activity’, and ‘acyl-CoA hydrolase activity’. As fatty acids are the main source of  
429 carbon and energy in fungi [30], this pathway could play a role in the ability of PG38 to better  
430 grow at neutral pH. In addition, this strategy seemed to be specific to the growth of PG38  
431 because fatty acid pathways were not enriched in the acidic condition in which PG6 showed  
432 better growth (**Fig. 7 B**).

433

434

435

436 **Fig 7. GO enrichment on DEGs explaining growth profiles.**

437 Enrichment factor (> 5) is represented on the x-axis and enriched GO-terms are described on the y-axis.

438 (A) 250 DEGs explaining PG38 growth at neutral pH

439 (B) 351 DEGs explaining PG6 growth at acidic pH

440 BP = Biological Process, CC = Cellular Component and MF = Molecular Function

441

442 In the same way, GO-enrichment on the 351 genes overexpressed in PG6 at acidic pH  
443 compared to neutral (**blue long arrow on Fig. 5**), showed that 53 participated to enrich 19  
444 GO-terms. Among these GO-terms, we particularly identified two main enriched pathways.  
445 The first one involved proteasome complex (GO-term ‘proteasome regulatory particle’) and  
446 ubiquitin carboxyl-terminal hydrolases genes (UCH): GO-terms ‘protein deubiquitination’  
447 and ‘thiol-dependent ubiquitin-specific protease activity’. The ubiquitin-proteasome system  
448 plays a role in response to stress or protein degradation in fungi [31], and deubiquitinating  
449 enzymes (which could remove protein ubiquitination) are known to be involved in an  
450 important regulatory strategy in ubiquitin mediated protein turnover [32]. The higher growth  
451 rate at acidic pH for PG6 could be linked to a high potential of protein turnover. The second  
452 enriched pathway was linked to ‘proton-transporting ATP synthase activity’ which provides  
453 energy for ATP synthesis, directly related to RNA synthesis; this might explain in part the  
454 growth especially through high transcriptomics activity and protein synthesis.

455

456 **RT-qPCR validation of RNA-Seq analyses**

457 Eight genes, which were significantly differentially expressed at least twice among the  
458 four main comparisons, were selected to validate the RNA-Seq data by RT-qPCR assay. RT-  
459 qPCR primers are described in **S2 table**. The selected genes take part of the Pal pathway  
460 (palB, palC, palF, and pacC) or are related to pathogenesis (lac1, lac2, gmk1, and exo) [8].  
461 This panel provided a large range of expression levels and enabled us to compare  
462 log2FoldChange values between RT-qPCR and RNA-Seq experiments. We found a moderate  
463 correlation ( $r^2 = 0.51$ ) between log2FoldChanges of both types of experiments but with a very  
464 strong significance according to Pearson correlation test (p-value < 0.01), confirming the  
465 validity of the RNA-Seq data (**Fig. 8 A**). The similarity of the data between RT-qPCR and  
466 RNA-Seq was more precisely confirmed by comparing the pacC (GGTG\_01809) expression  
467 (**Fig. 8 B**). In both types of experiments, pacC displayed similar expression’s pattern: it was  
468 less expressed at acidic pH than at neutral pH, as observed in other fungi such as *A. nidulans*



469 [33], *Sclerotinia sclerotiorum* [34], *Fusarium Oxysporum* [35], *Colletotrichum acutatum* [36],  
470 *Aspergillus oryzae* [37], or *Coniothyrium minitans* [38].

471

472 **Fig 8. RT-qPCR and RNAseq data comparison.**

473 A. Correlation between log2FoldChange of quantitative real-time PCR (x-axis) and RNAseq (y-axis) on 8 selected  
474 genes in the four main contrasts.

475 B. Comparison of pacC mean expression in all samples (black bars represents RNAseq results; red points  
476 represented RT-qPCR results). Errors bars represented standard errors of the means.

477 A: acidic pH ; N: neutral pH ; pacC DESeq2: transcript expression of pacC (DESeq2 normalized counts); pacC  
478 qPCR: transcript expression of pacC (RT-qPCR expression normalized with external controls).

479

480 Although slight variations in correlations were observed between the two methods,  
481 similar trends in transcript abundances were generally observed confirming a reliable  
482 expression result generated by RNA sequencing.

483

484 **CONCLUSIONS**

485

486 This study is gives new insights on gene expression regulation monitored by the ambient  
487 pH in a strain-specific way with opposite growth rate profiles in function of the extracellular  
488 pH.

489 Independently of the ambient pH, the two strains have different strategies in adapting  
490 transcriptome to growth: PG38 expressed mainly genes involved in response to stresses (DNA  
491 repair and antibiotic resistance), whereas genes involved in mitochondrial inheritance and  
492 energy transfer were more expressed in PG6. So PG38 (G2 type) could have a better ability to  
493 survive and/or to resist to stresses, whereas PG6 (G1 type) could have a better ability to grow.  
494 Moreover, both strains are able to regulate their intracellular pH and activated mechanisms to  
495 produce ascospores when growing in neutral conditions whereas they overexpressed functions  
496 linked to mitochondria transport in acidic conditions.

497 This study also highlighted that both strains adopted different strategies to grow,  
498 depending on the ambient pH. These two strains were able to grow on both pH conditions. At  
499 acidic pH, PG6 was able to highly grow and showed an enrichment of pathways related to  
500 protein deubiquitination and ATP synthesis, but no genes involved in survival strategies were  
501 particularly expressed. On the other hand, PG6 was disadvantaged at neutral pH because it  
502 had lower ability to grow and to survive or resist to stresses. These two characteristics could  
503 finally lead to a decrease of this type of strains in fungal population. Concerning PG38, the

504 strain had better growth in neutral conditions, especially via the fatty acids biosynthesis  
505 pathway. At acidic pH, despite a lower growth, this strain displayed ability to stress resistance  
506 potentially linked to survivability. In total, whatever the pH but particularly at neutral pH,  
507 PG38 could have better abilities to survive in soils during intercrops, so allowing the presence  
508 of inoculum source to the next wheat culture. Thus, we described, in an original way,  
509 different pH-dependent strategies related to growth rate profiles in the two studied strains.

510 To go further in the understanding of survival and infection dependent on the pH and on  
511 the strain, particularly concerning the peak of G2 type after few years of wheat monoculture  
512 in neutral conditions, other similar studies including more strains and pH conditions are  
513 necessary. Moreover, *Ggt* transcriptomics study in host plant grown in soils of different pH  
514 would be interesting to focus more precisely on the infection stage. At this time indeed, only  
515 one transcriptomics study highlighted that over 3,000 genes (including genes involved in  
516 signal transduction pathways, development, plant cell wall degradation, and response to plant  
517 defense compounds) were differentially expressed between *Ggt* in culture and *Ggt* infecting  
518 roots, but this study is based on a single strain not characterized for G1/G2 type [39].

519

## 520 REFERENCES

521

- 522 1. Gutteridge RJ, Bateman GL, Todd AD. Variation in the effects of take-all disease on grain  
523 yield and quality of winter cereals in field experiments. *Pest Manag Sci.* 2003;59: 215–  
524 224. doi:10.1002/ps.574
- 525 2. Daval S, Lebreton L, Gazengel K, Guillerm-Erckelboudt A-Y, Sarniguet A. Genetic  
526 evidence for differentiation of *Gaeumannomyces graminis* var. *tritici* into two major  
527 groups. *Plant Pathol.* 2010;59: 165–178. doi:10.1111/j.1365-3059.2009.02158.x
- 528 3. Lebreton L, Gosme M, Lucas P, Guillerm-Erckelboudt A-Y, Sarniguet A. Linear  
529 relationship between *Gaeumannomyces graminis* var. *tritici* (*Ggt*) genotypic  
530 frequencies and disease severity on wheat roots in the field. *Environ Microbiol.* 2007;9:  
531 492–499. doi:10.1111/j.1462-2920.2006.01166.x
- 532 4. Lebreton L, Lucas P, Dugas F, Guillerm A-Y, Schoeny A, Sarniguet A. Changes in  
533 population structure of the soilborne fungus *Gaeumannomyces graminis* var. *tritici*  
534 during continuous wheat cropping. *Environ Microbiol.* 2004;6: 1174–1185.  
535 doi:10.1111/j.1462-2920.2004.00637.x
- 536 5. Ownley BH. Influence of In Situ and In Vitro pH on Suppression of *Gaeumannomyces*  
537 *graminis* var. *tritici* by *Pseudomonas fluorescens* 2-79. *Phytopathology.* 1992;82: 178.  
538 doi:10.1094/Phyto-82-178

- 539 6. Raaijmakers JM, Paulitz TC, Steinberg C, Alabouvette C, Moëgne-Loccoz Y. The  
540 rhizosphere: a playground and battlefield for soilborne pathogens and beneficial  
541 microorganisms. *Plant Soil*. 2009;321: 341–361. doi:10.1007/s11104-008-9568-6
- 542 7. Cook RJ. Take-all of wheat - ScienceDirect. 2003 [cited 13 May 2019]. Available:  
543 <https://www.sciencedirect.com/science/article/pii/S0885576503000420>
- 544 8. Daval S, Lebreton L, Gracianne C, Guillerm-Erckelboudt A-Y, Boutin M, Marchi M, et al.  
545 Strain-specific variation in a soilborne phytopathogenic fungus for the expression of  
546 genes involved in pH signal transduction pathway, pathogenesis and saprophytic  
547 survival in response to environmental pH changes. *Fungal Genet Biol*. 2013;61: 80–89.  
548 doi:10.1016/j.fgb.2013.09.009
- 549 9. Caddick MX, Brownlee AG, Arst HN. Regulation of gene expression by pH of the growth  
550 medium in *Aspergillus nidulans*. *Mol Gen Genet MGG*. 1986;203: 346–353.  
551 doi:10.1007/BF00333978
- 552 10. Peñalva MA, Tilburn J, Bignell E, Arst HN. Ambient pH gene regulation in fungi: making  
553 connections. *Trends Microbiol*. 2008;16: 291–300. doi:10.1016/j.tim.2008.03.006
- 554 11. Lebreton L, Daval S, Guillerm-Erckelboudt A-Y, Gracianne C, Gazengel K, Sarniguet A.  
555 Sensitivity to pH and ability to modify ambient pH of the take-all fungus  
556 *Gaeumannomyces graminis* var. *tritici*. *Plant Pathol*. 2014;63: 117–128.  
557 doi:10.1111/ppa.12062
- 558 12. Chen Y, Li B, Xu X, Zhang Z, Tian S. The pH-responsive PacC transcription factor plays  
559 pivotal roles in virulence and patulin biosynthesis in *Penicillium expansum*. *Environ*  
560 *Microbiol*. 2018;20: 4063–4078. doi:10.1111/1462-2920.14453
- 561 13. Zhang T, Sun X, Xu Q, Candelas LG, Li H. The pH signaling transcription factor PacC is  
562 required for full virulence in *Penicillium digitatum*. *Appl Microbiol Biotechnol*. 2013;97:  
563 9087–9098. doi:10.1007/s00253-013-5129-x
- 564 14. Smiley RW. Relationship Between Take-all of Wheat and Rhizosphere pH in Soils  
565 Fertilized with Ammonium vs. Nitrate-Nitrogen. *Phytopathology*. 1973;63: 882.  
566 doi:10.1094/Phyto-63-882
- 567 15. Kwak Y-S, Bakker PAHM, Glandorf DCM, Rice JT, Paulitz TC, Weller DM. Diversity,  
568 virulence, and 2,4-diacetylphloroglucinol sensitivity of *Gaeumannomyces graminis* var.  
569 *tritici* isolates from Washington state. *Phytopathology*. 2009;99: 472–479.  
570 doi:10.1094/PHYTO-99-5-0472
- 571 16. Fåhraeus G, Reinhammar B. Large scale production and purification of laccase from  
572 cultures of the fungus *Polyporus versicolor* and some properties of laccase A. *Acta*  
573 *Chem Scand*. 1967;21: 2367–2378.

- 574 17. Dobin A, Davis CA, Schlesinger F, Drenkow J, Zaleski C, Jha S, et al. STAR: ultrafast  
575 universal RNA-seq aligner. *Bioinformatics*. 2013;29: 15–21.  
576 doi:10.1093/bioinformatics/bts635
- 577 18. Okagaki LH, Nunes CC, Sailsbery J, Clay B, Brown D, John T, et al. Genome Sequences of  
578 Three Phytopathogenic Species of the Magnaporthaceae Family of Fungi. *G3 Bethesda*  
579 *Md.* 2015;5: 2539–2545. doi:10.1534/g3.115.020057
- 580 19. Liao Y, Smyth GK, Shi W. featureCounts: an efficient general purpose program for  
581 assigning sequence reads to genomic features. *Bioinformatics*. 2014;30: 923–930.  
582 doi:10.1093/bioinformatics/btt656
- 583 20. Love MI, Huber W, Anders S. Moderated estimation of fold change and dispersion for  
584 RNA-seq data with DESeq2. *Bioinformatics*; 2014 Feb. doi:10.1101/002832
- 585 21. Rau A, Maugis-Rabusseau C, Martin-Magniette M-L, Celeux G. Co-expression analysis of  
586 high-throughput transcriptome sequencing data with Poisson mixture models.  
587 *Bioinformatics*. 2015;31: 1420–1427. doi:10.1093/bioinformatics/btu845
- 588 22. Alexa A, Rahnenfuhrer J. Gene set enrichment analysis with topGO. 2007.
- 589 23. Daval S, Lebreton L, Gazengel K, Boutin M, Guillerm-Erckelboudt A-Y, Sarniguet A. The  
590 biocontrol bacterium *Pseudomonas fluorescens Pf29Arp* strain affects the  
591 pathogenesis-related gene expression of the take-all fungus *Gaeumannomyces*  
592 *graminis* var. *tritici* on wheat roots. *Mol Plant Pathol*. 2011;12: 839–854.  
593 doi:10.1111/j.1364-3703.2011.00715.x
- 594 24. Sabater-Muñoz B, Legeai F, Rispe C, Joël B, Dearden P, Dossat C, et al. Large-scale gene  
595 discovery in the pea aphid *Acyrtosiphon pisum* (Heiptera). *Genome Biol*. 2006;7: R21.  
596 doi:10.1186/gb-2006-7-3-r21
- 597 25. Reis VCB, Torres FAG, Poças-Fonseca MJ, De-Souza MT, Souza DP de, Almeida JRM, et  
598 al. Cell cycle, DNA replication, repair, and recombination in the dimorphic human  
599 pathogenic fungus *Paracoccidioides brasiliensis*. *Genet Mol Res GMR*. 2005;4: 232–250.
- 600 26. Lill R, Hoffmann B, Molik S, Pierik AJ, Rietzschel N, Stehling O, et al. The role of  
601 mitochondria in cellular iron–sulfur protein biogenesis and iron metabolism. *Biochim*  
602 *Biophys Acta BBA - Mol Cell Res*. 2012;1823: 1491–1508.  
603 doi:10.1016/j.bbamcr.2012.05.009
- 604 27. Boldogh IR, Pon LA. Interactions of mitochondria with the actin cytoskeleton. *Biochim*  
605 *Biophys Acta BBA - Mol Cell Res*. 2006;1763: 450–462.  
606 doi:10.1016/j.bbamcr.2006.02.014
- 607 28. Mishra P, Chan DC. Mitochondrial dynamics and inheritance during cell division,  
608 development and disease. *Nat Rev Mol Cell Biol*. 2014;15: 634–646.  
609 doi:10.1038/nrm3877

- 610 29. Diakov TT, Kane PM. Regulation of vacuolar proton-translocating ATPase activity and  
611 assembly by extracellular pH. *J Biol Chem.* 2010;285: 23771–23778.  
612 doi:10.1074/jbc.M110.110122
- 613 30. Hynes MJ, Murray SL, Duncan A, Khew GS, Davis MA. Regulatory Genes Controlling  
614 Fatty Acid Catabolism and Peroxisomal Functions in the Filamentous Fungus *Aspergillus*  
615 *nidulans*. *Eukaryot Cell.* 2006;5: 794–805. doi:10.1128/EC.5.5.794-805.2006
- 616 31. Liu T-B, Xue C. The Ubiquitin-Proteasome System and F-box Proteins in Pathogenic  
617 Fungi. *Mycobiology.* 2011;39: 243–248. doi:10.5941/MYCO.2011.39.4.243
- 618 32. Wilkinson KD. Regulation of ubiquitin-dependent processes by deubiquitinating  
619 enzymes. *FASEB J Off Publ Fed Am Soc Exp Biol.* 1997;11: 1245–1256.  
620 doi:10.1096/fasebj.11.14.9409543
- 621 33. Tilburn J, Sarkar S, Widdick DA, Espeso EA, Orejas M, Mungroo J, et al. The *Aspergillus*  
622 *PacC* zinc finger transcription factor mediates regulation of both acid- and alkaline-  
623 expressed genes by ambient pH. *EMBO J.* 1995;14: 779–790.
- 624 34. Rollins JA. The *Sclerotinia sclerotiorum* *pac1* Gene Is Required for Sclerotial  
625 Development and Virulence. *Mol Plant Microbe Interact.* 2003;16: 785–795.  
626 doi:10.1094/MPMI.2003.16.9.785
- 627 35. Caracuel Z, Roncero MIG, Espeso EA, González-Verdejo CI, García-Maceira FI, Pietro AD.  
628 The pH signalling transcription factor *PacC* controls virulence in the plant pathogen  
629 *Fusarium oxysporum*. *Mol Microbiol.* 2003;48: 765–779. doi:10.1046/j.1365-  
630 2958.2003.03465.x
- 631 36. You B-J, Choquer M, Chung K-R. The *Colletotrichum acutatum* gene encoding a putative  
632 pH-responsive transcription regulator is a key virulence determinant during fungal  
633 pathogenesis on citrus. *Mol Plant-Microbe Interact MPMI.* 2007;20: 1149–1160.  
634 doi:10.1094/MPMI-20-9-1149
- 635 37. Dohmoto M, Inoue Y, Kobayashi A, Ohashi S, Sano M. Characterization of the *palH* Gene  
636 from *Aspergillus oryzae*. *Biosci Biotechnol Biochem.* 2010;74: 188–190.  
637 doi:10.1271/bbb.90575
- 638 38. Han Y-C, Li G-Q, Yang L, Jiang D-H. Molecular cloning, characterization and expression  
639 analysis of a *pacC* homolog in the mycoparasite *Coniothyrium minitans*. *World J*  
640 *Microbiol Biotechnol.* 2011;27: 381–391. doi:10.1007/s11274-010-0469-5
- 641 39. Yang L, Xie L, Xue B, Goodwin PH, Quan X, Zheng C, et al. Comparative Transcriptome  
642 Profiling of the Early Infection of Wheat Roots by *Gaeumannomyces graminis* var.  
643 *tritici*. *PLOS ONE.* 2015;10: e0120691. doi:10.1371/journal.pone.0120691

644

645

646 **SUPPORTING INFORMATION CAPTIONS**

647

648 **S1 Table. Composition of the media used in this study.**

649 **S2 Table. Oligonucleotide primers used in this study.**

650

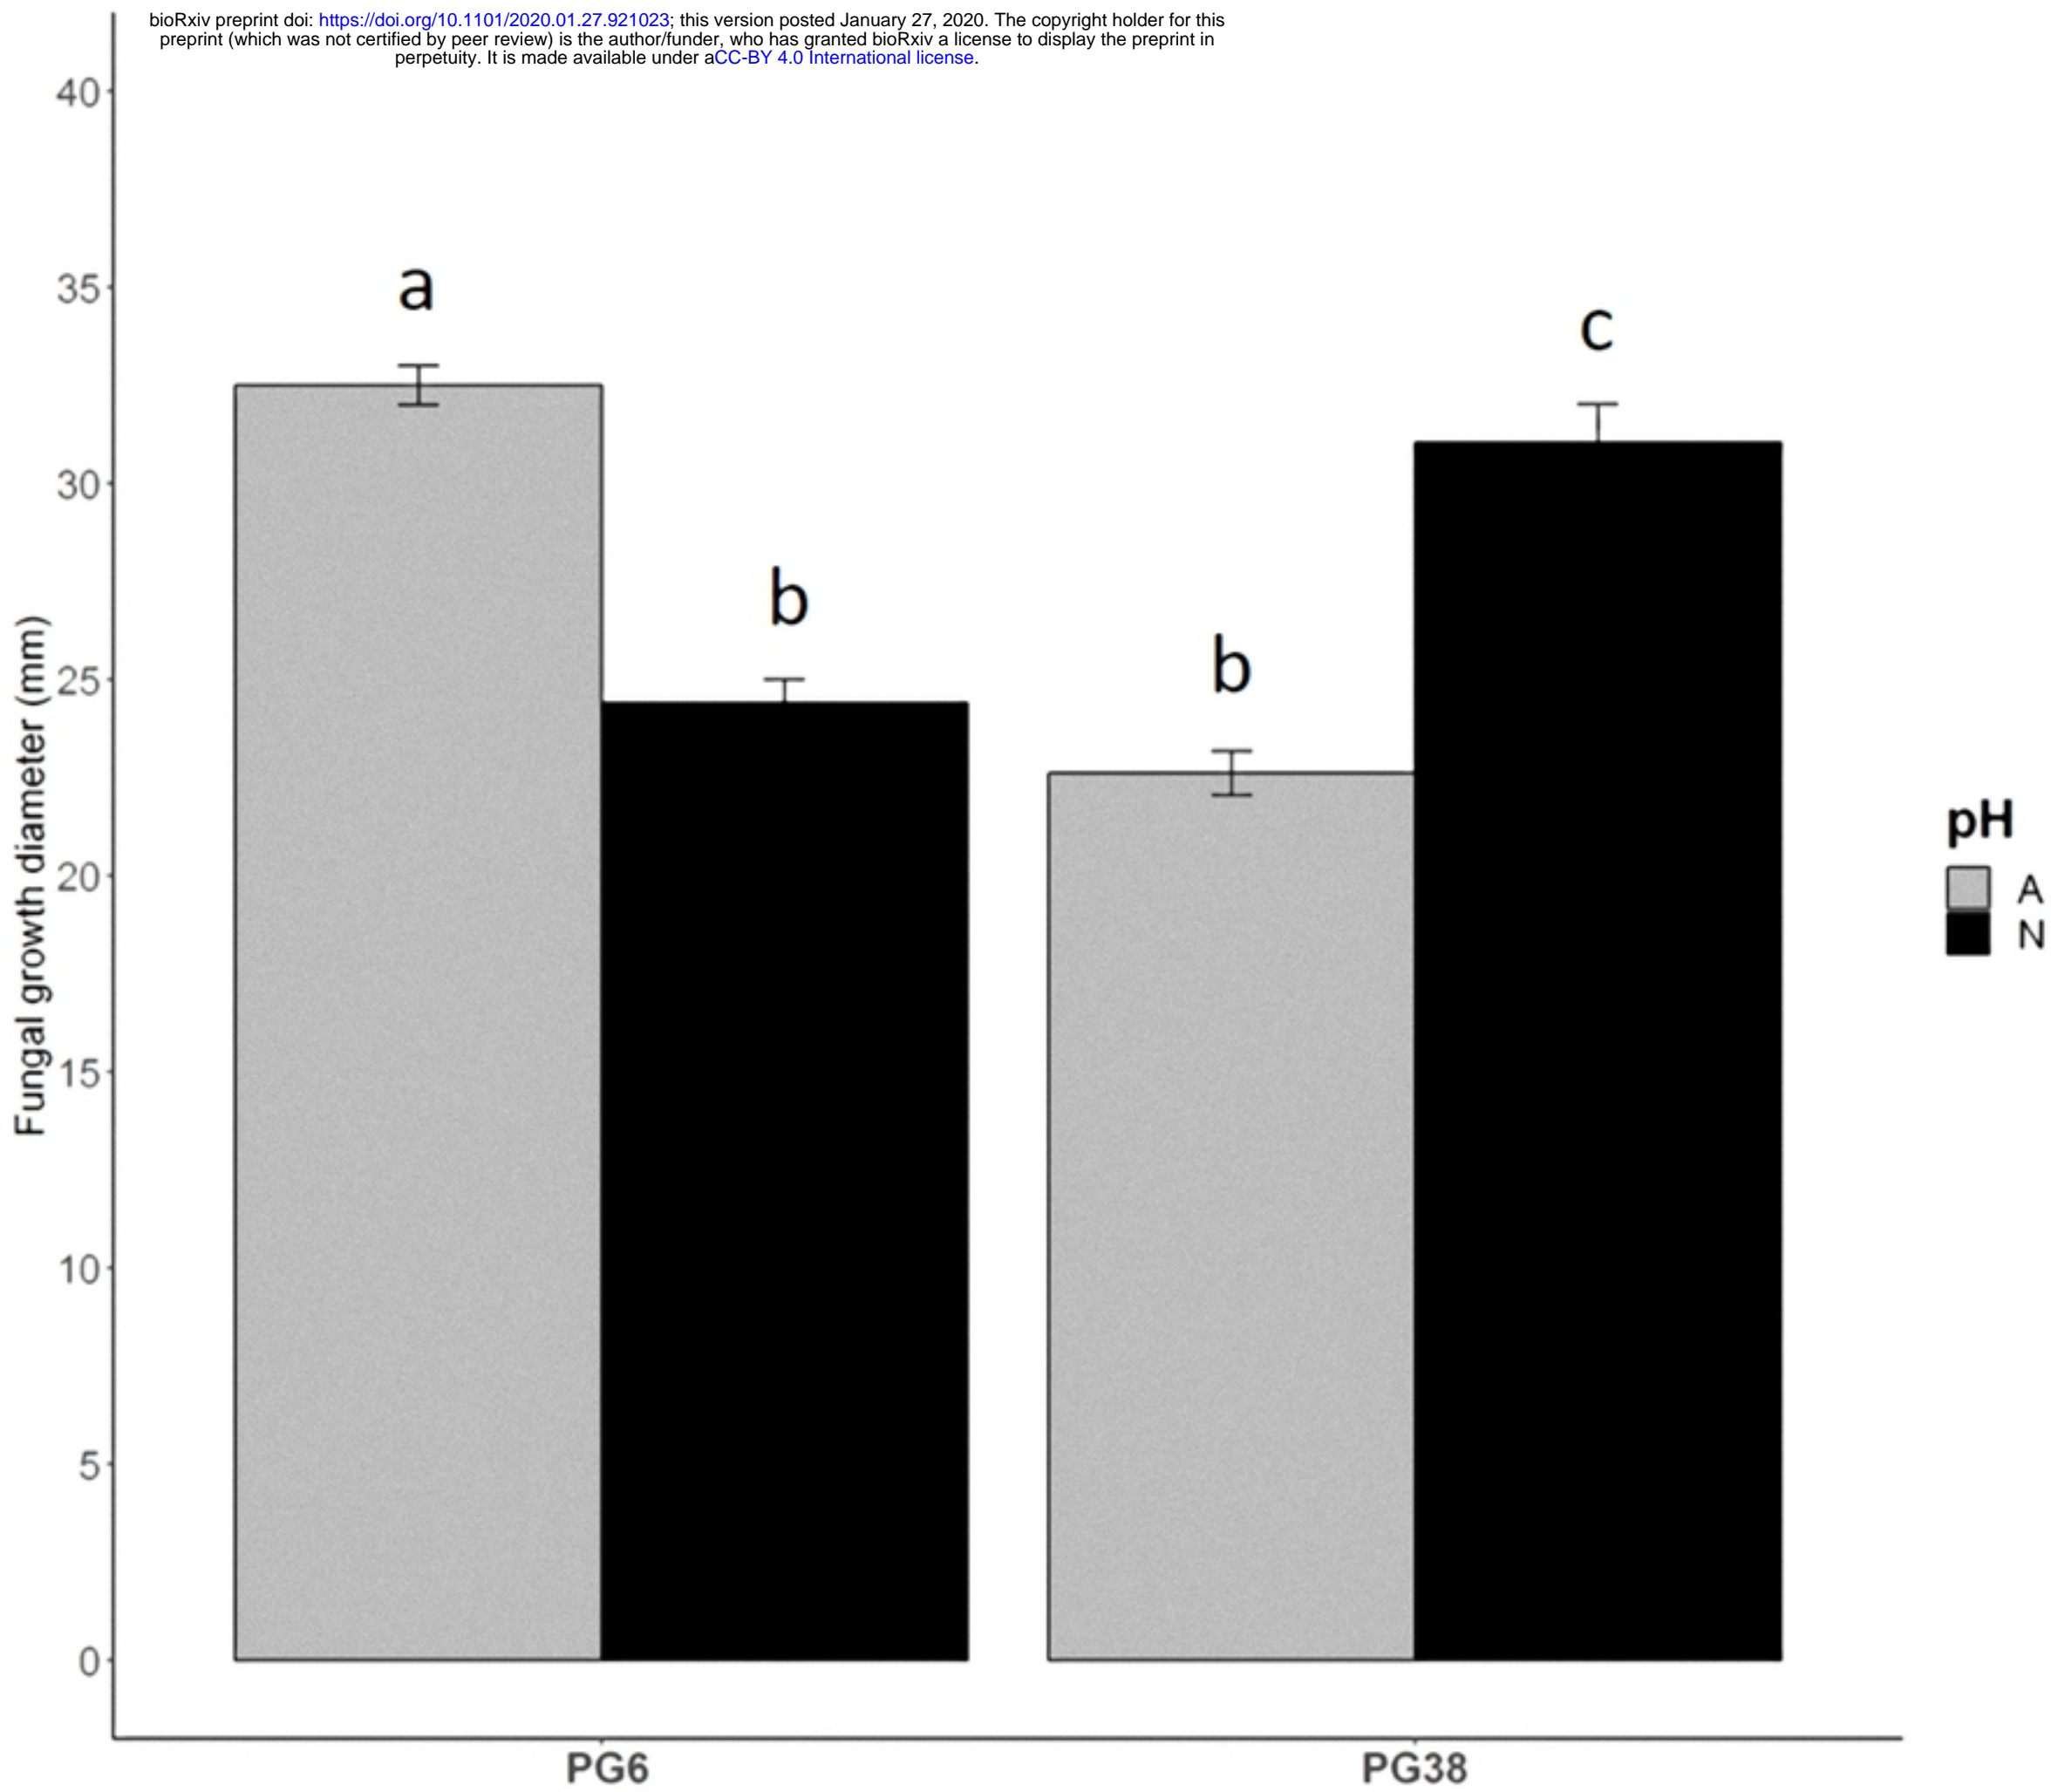

Fig1

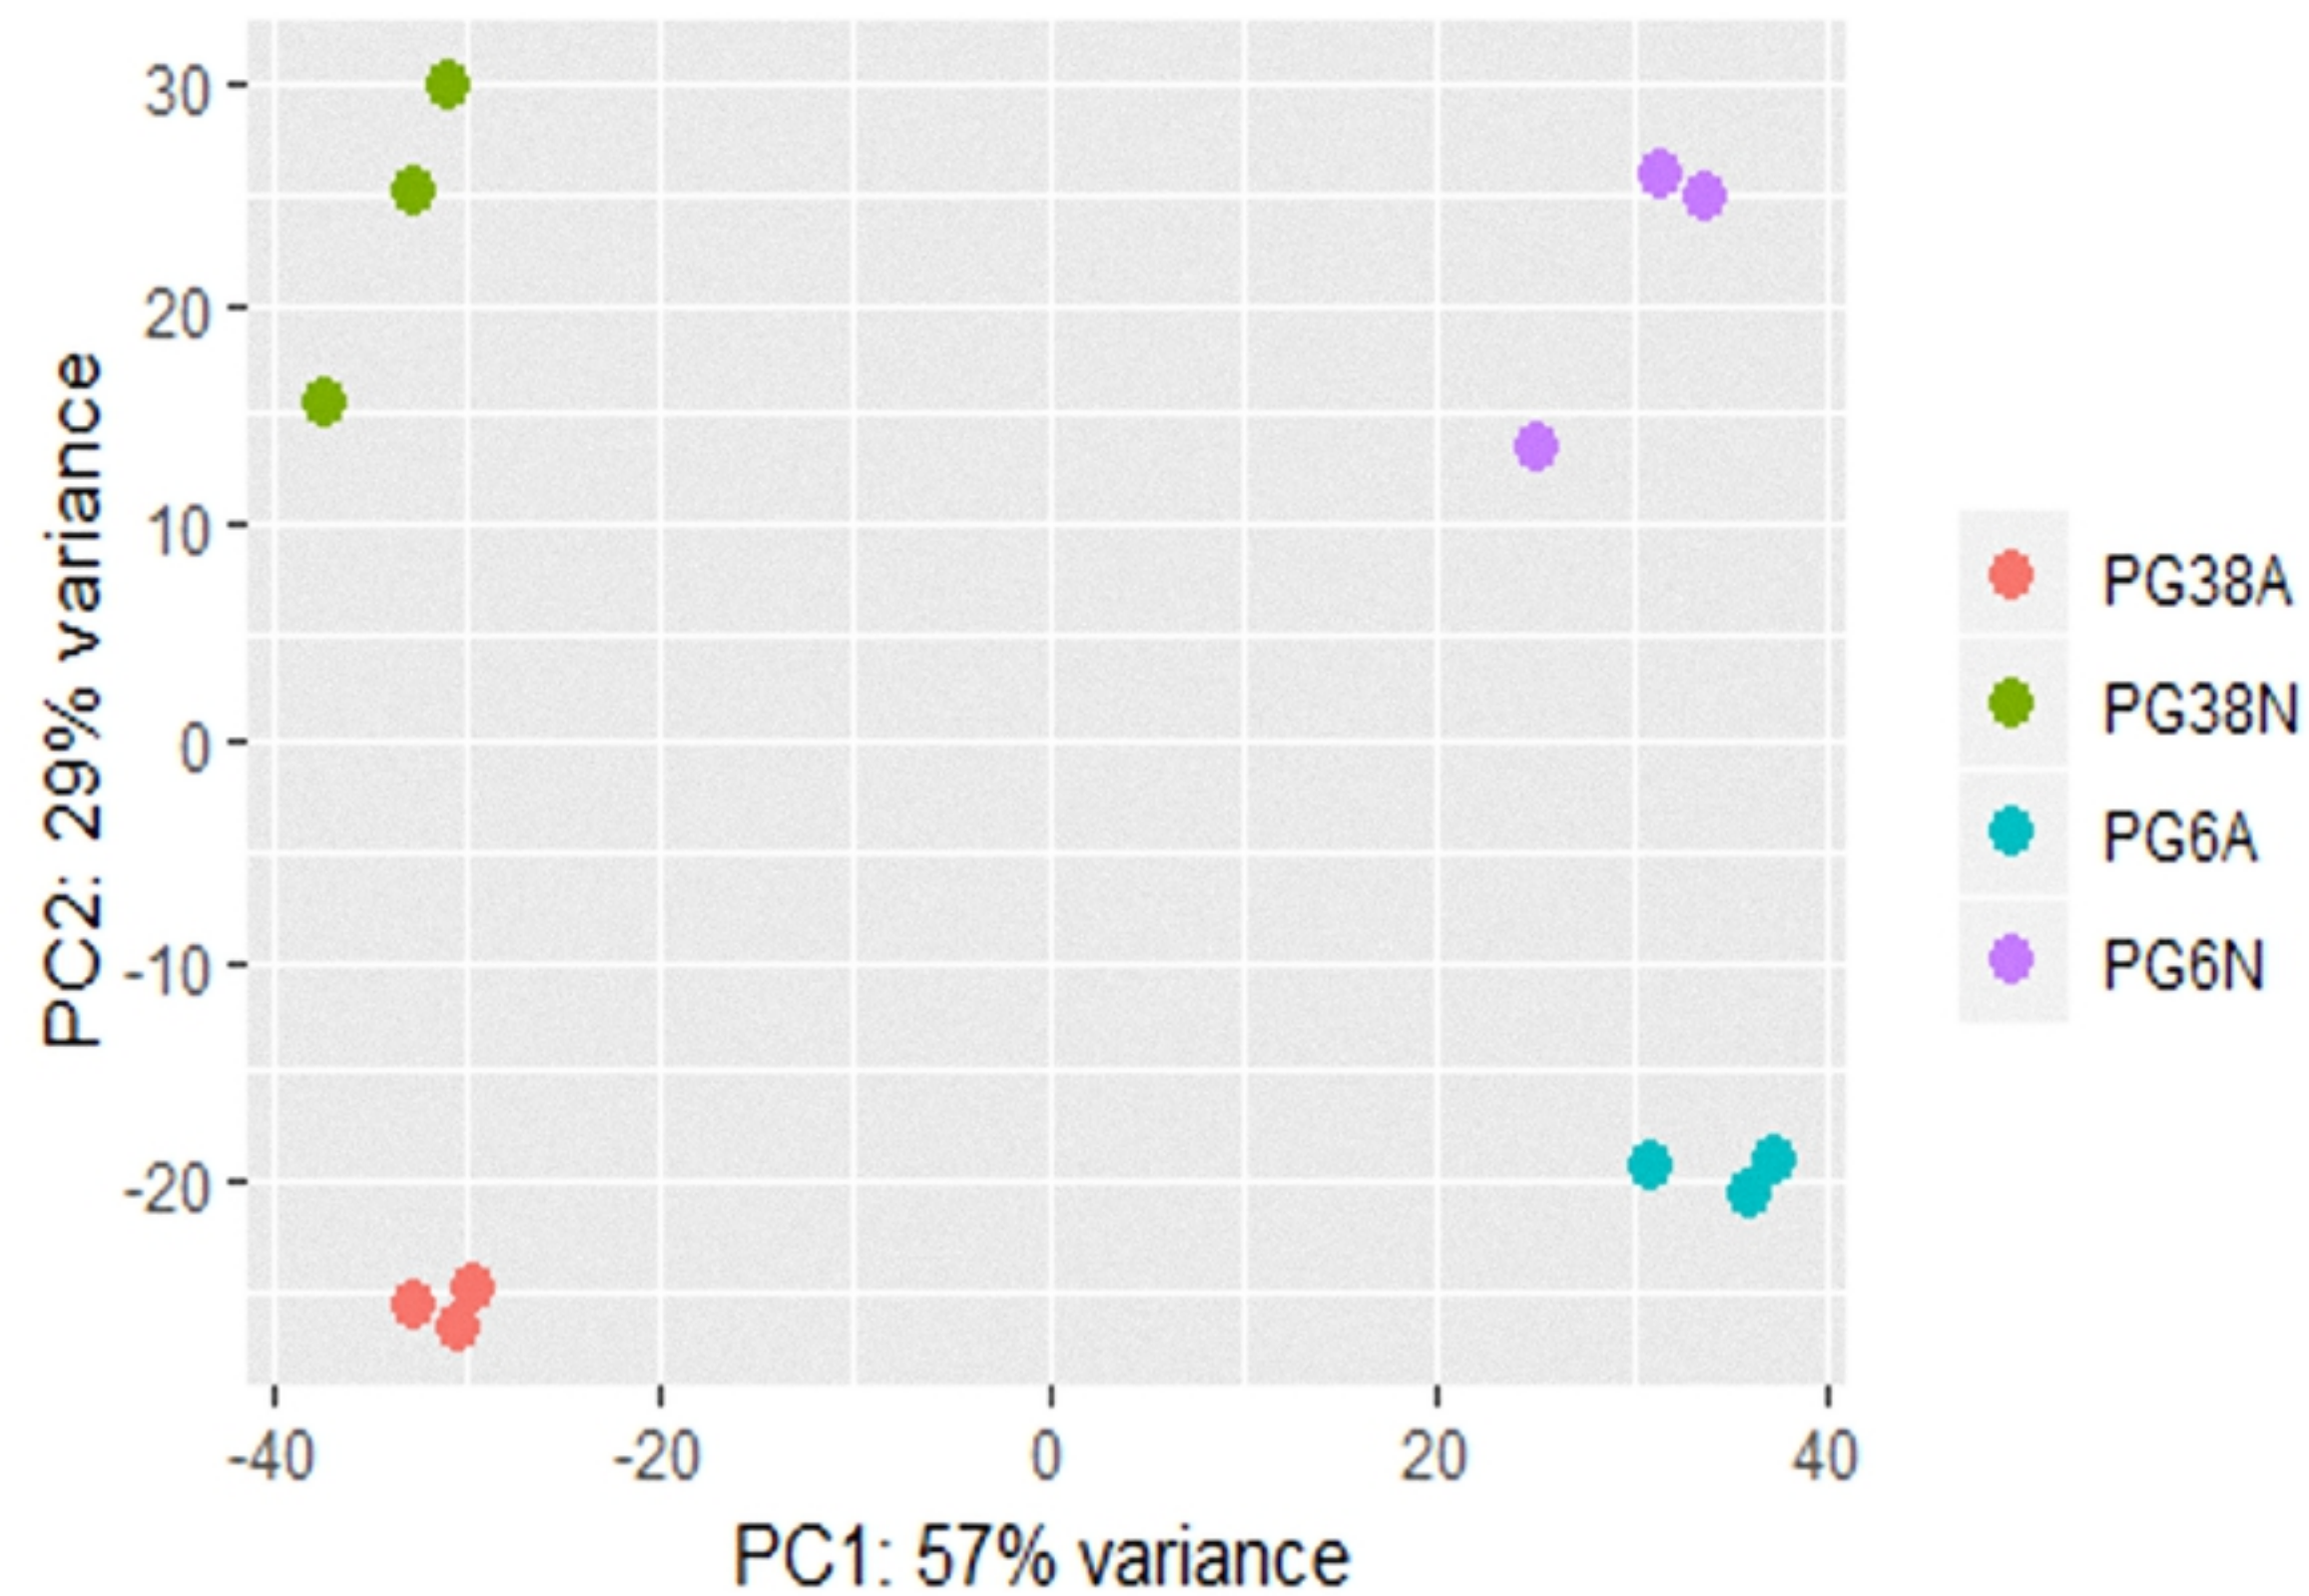

Fig2



bioRxiv preprint doi: <https://doi.org/10.1101/2020.01.27.921023>; this version posted January 27, 2020. The copyright holder for this preprint (which was not certified by peer review) is the author/funder, who has granted bioRxiv a license to display the preprint in perpetuity. It is made available under aCC-BY 4.0 International license.

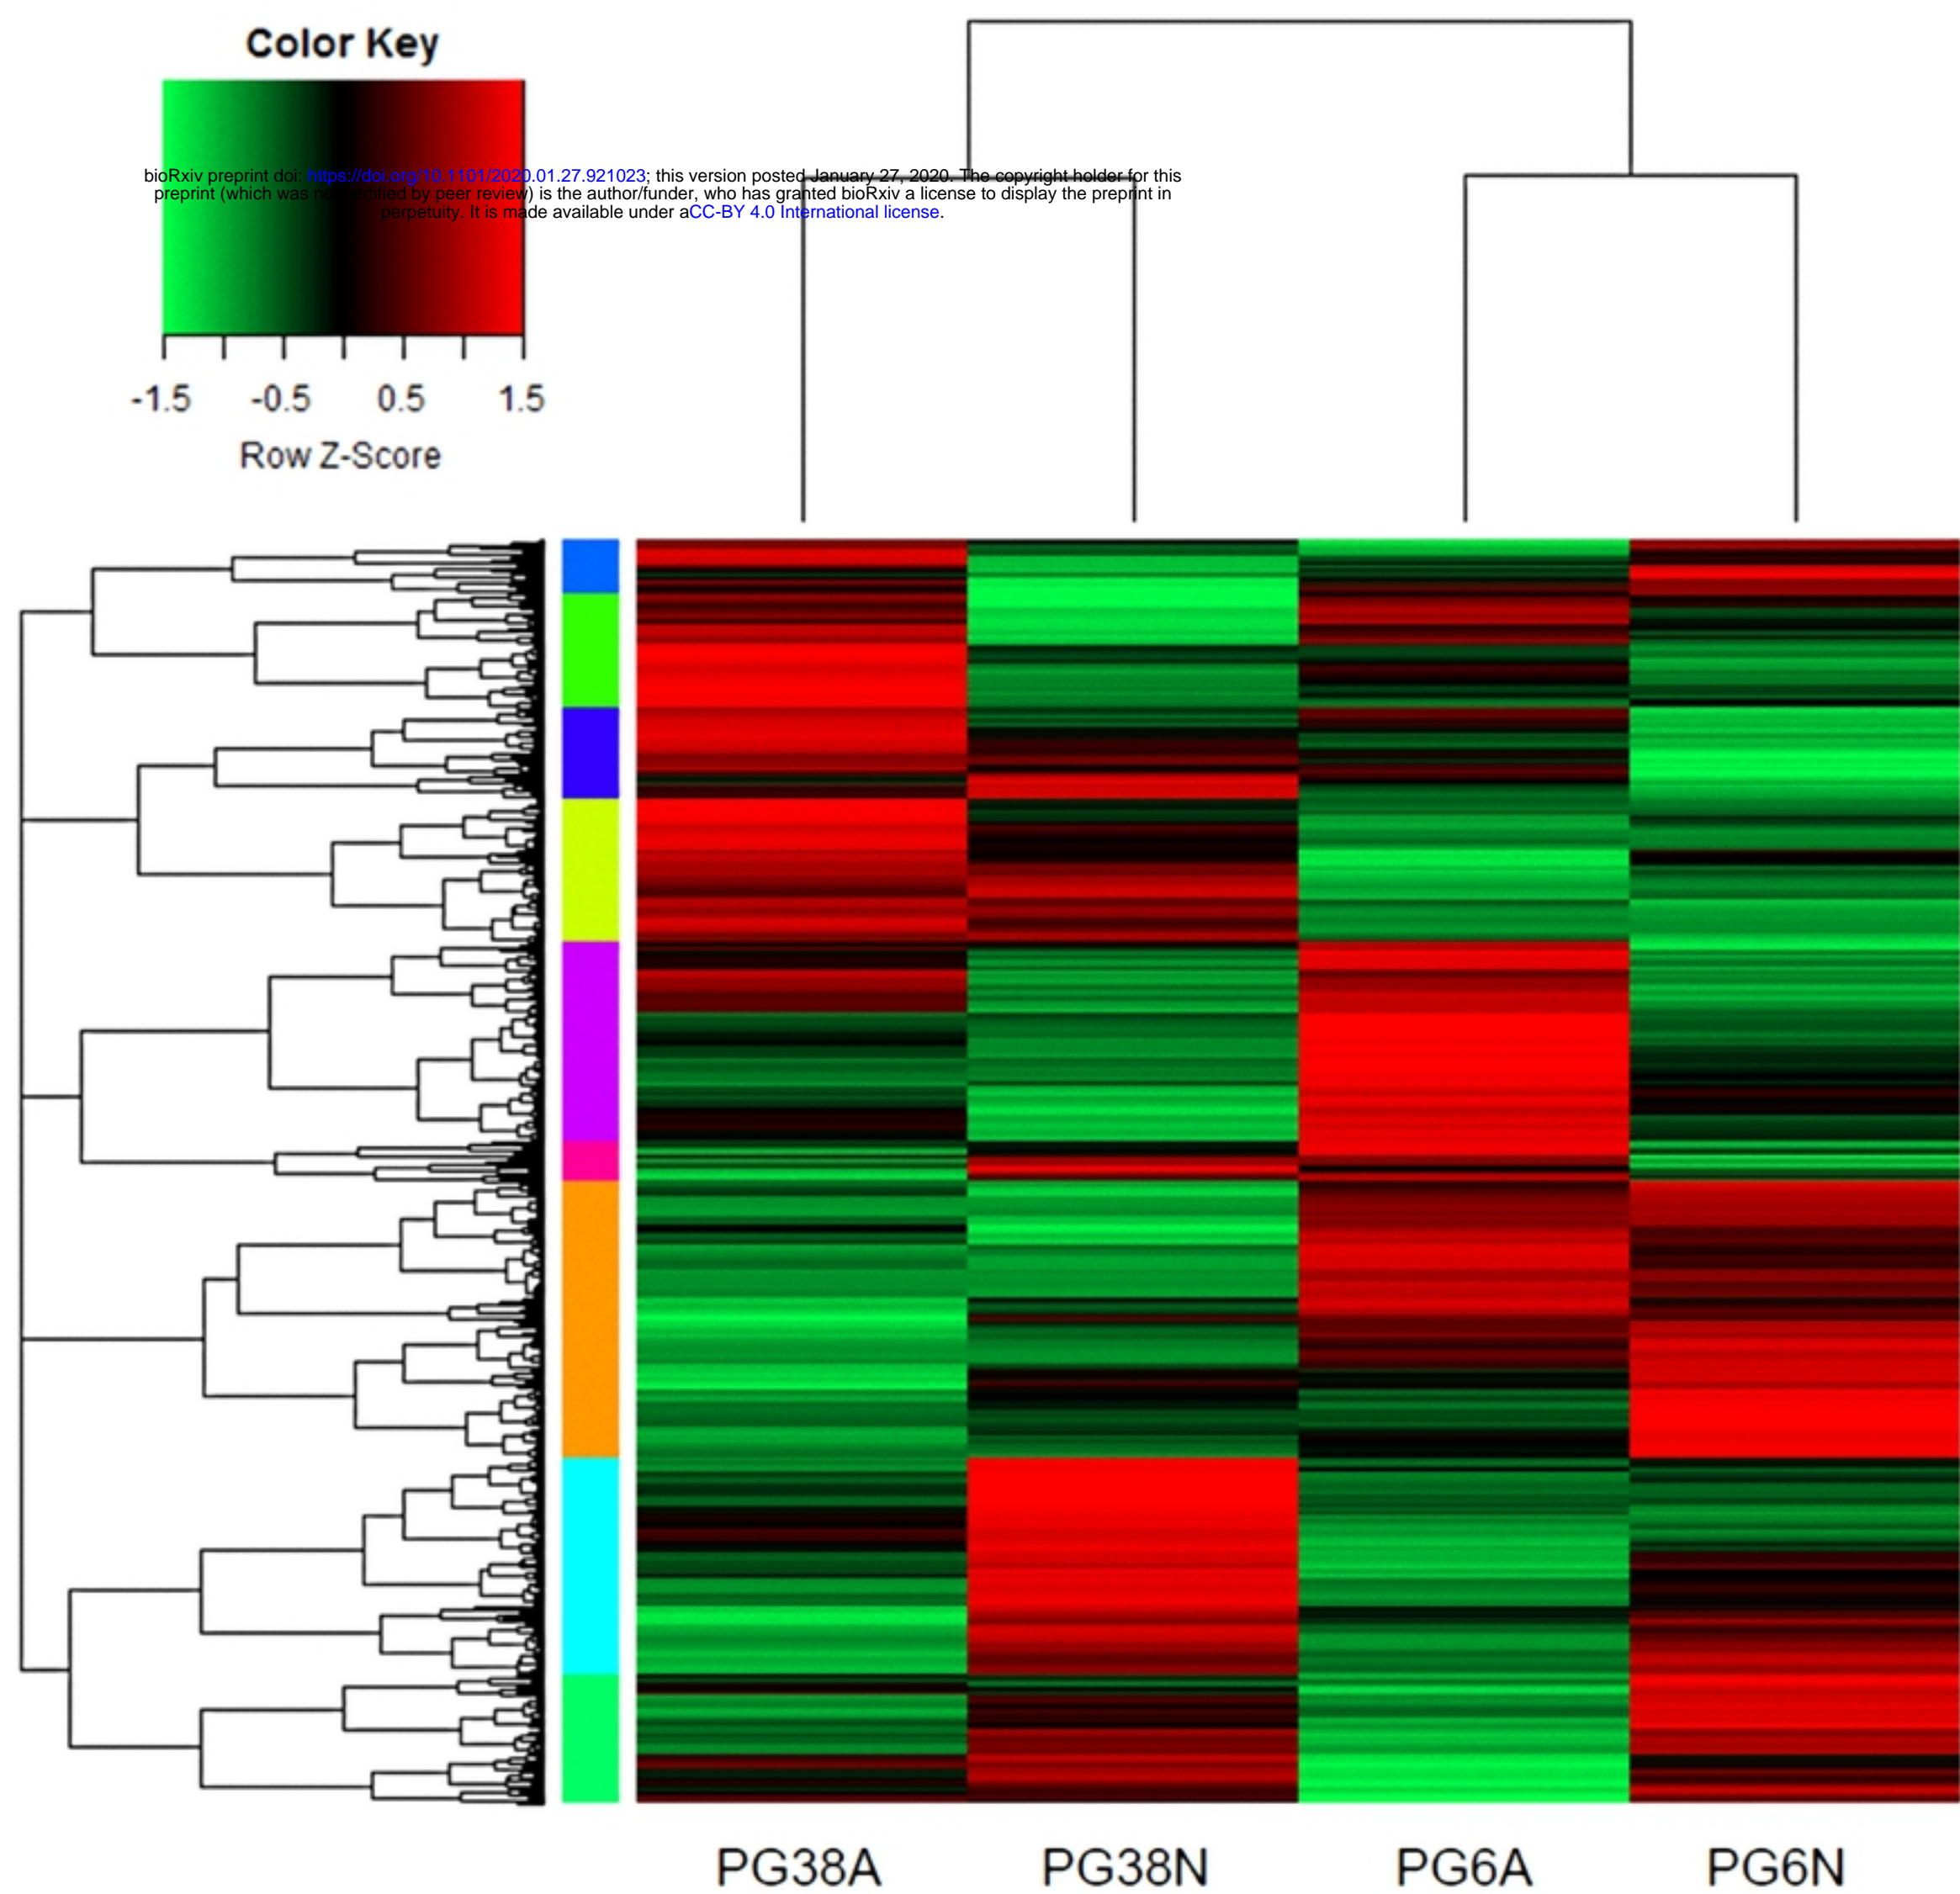

Fig3

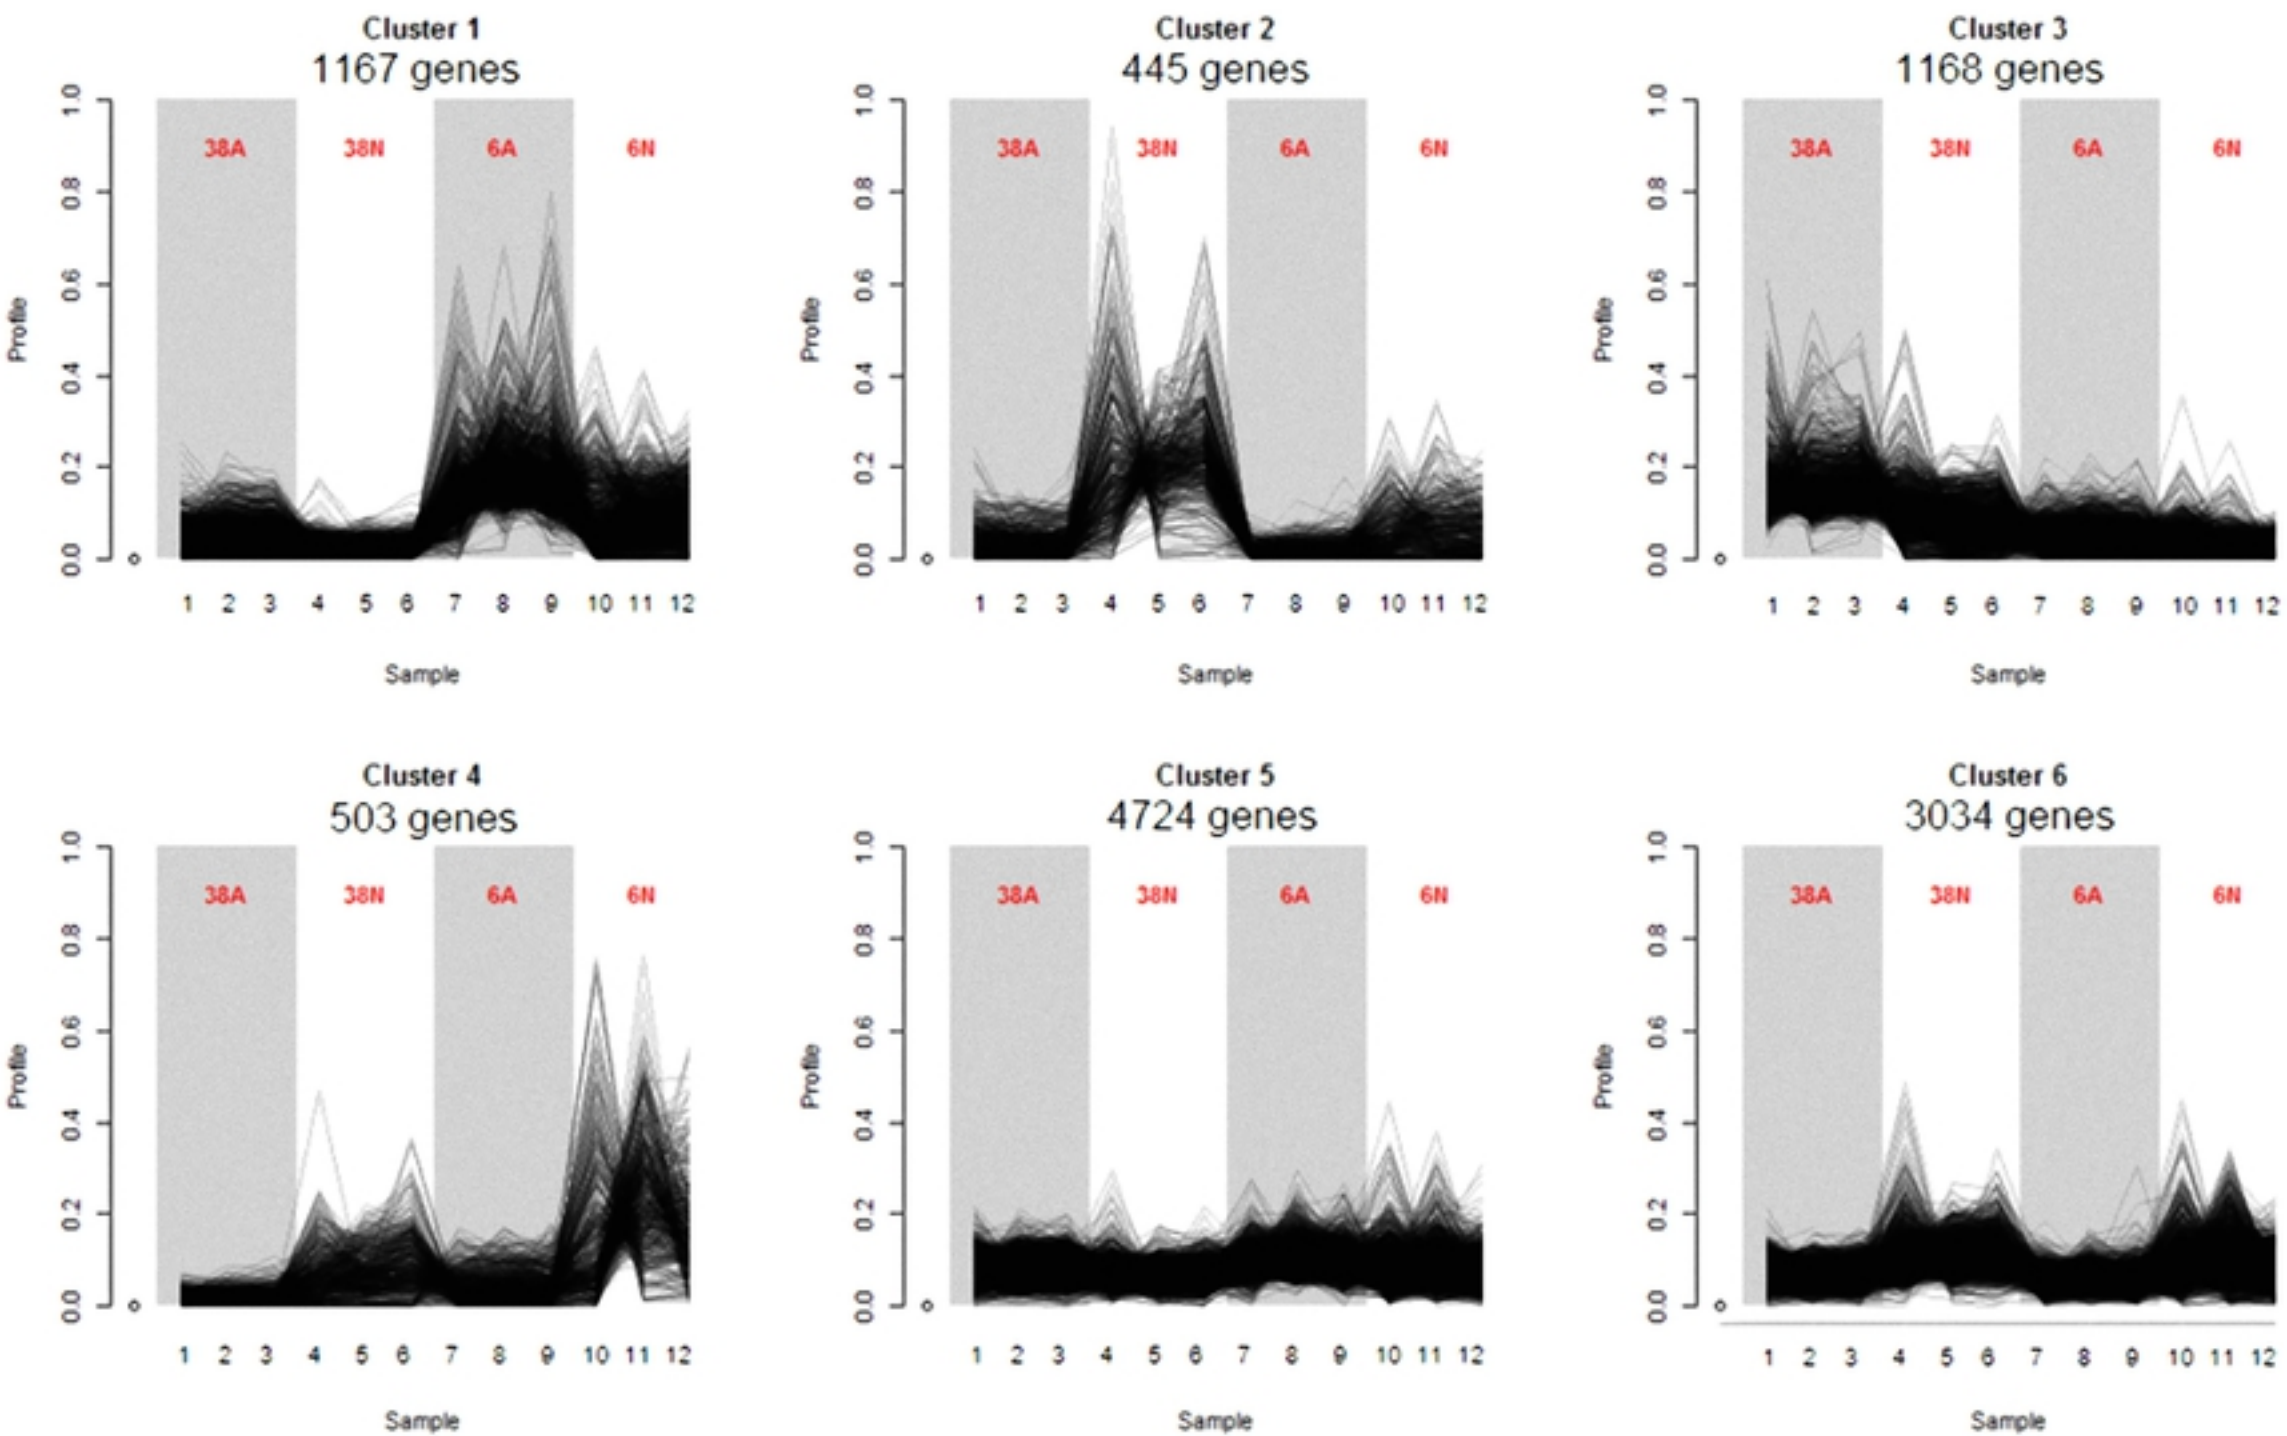

Fig4

bioRxiv preprint doi: <https://doi.org/10.1101/2020.01.27.921023>; this version posted January 27, 2020. The copyright holder for this preprint (which was not certified by peer review) is the author/funder, who has granted bioRxiv a license to display the preprint in perpetuity. It is made available under aCC-BY 4.0 International license.

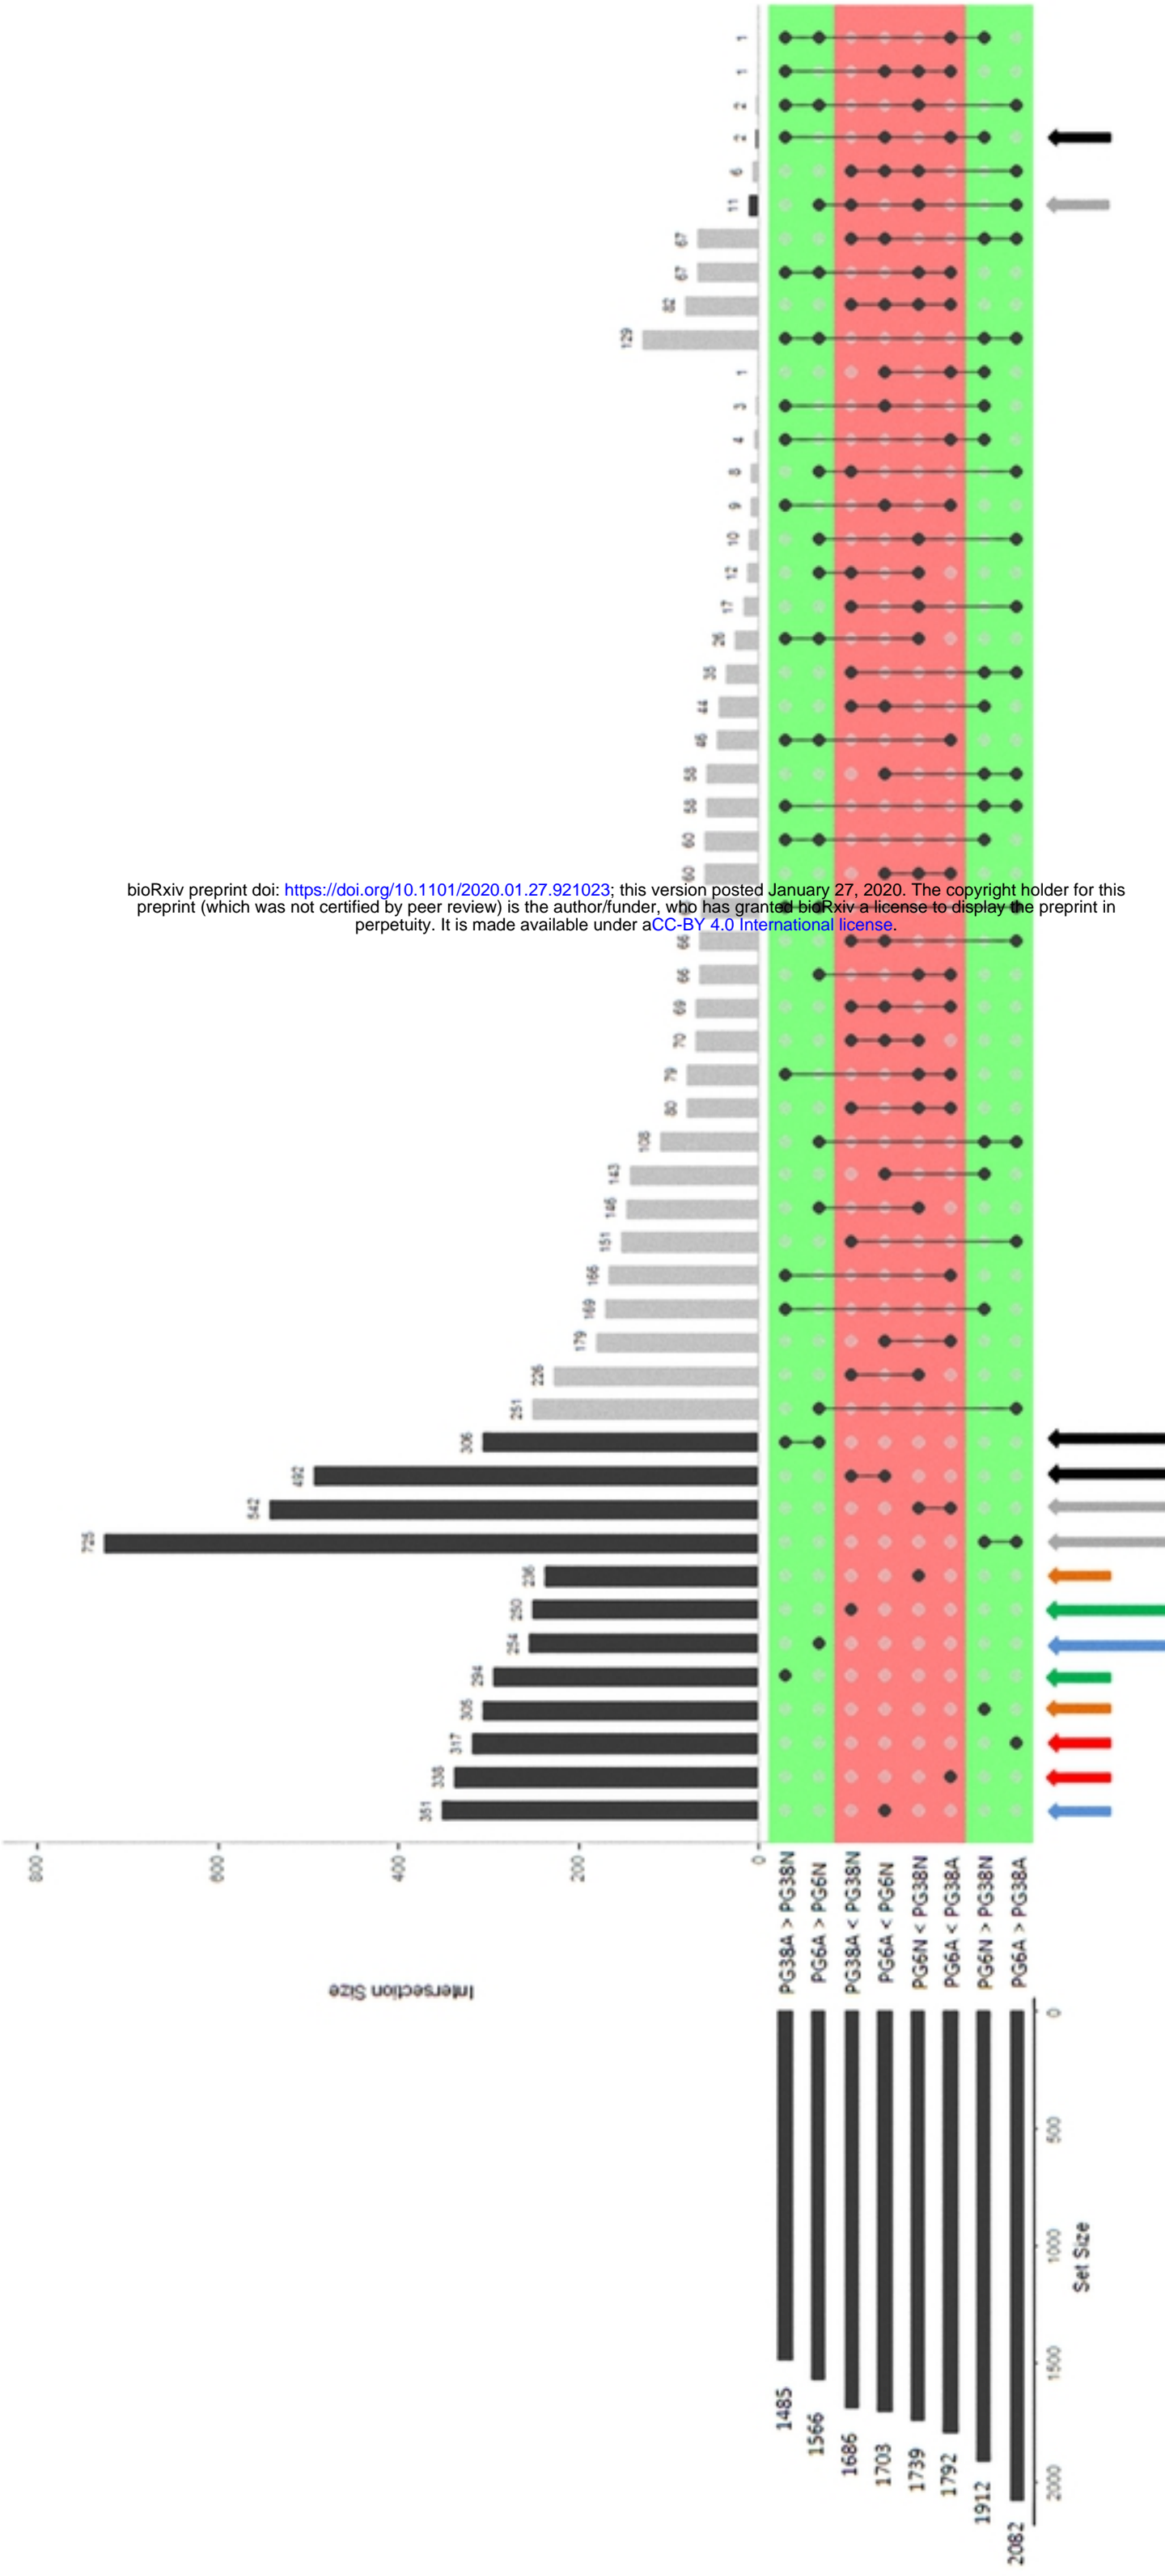

Fig5

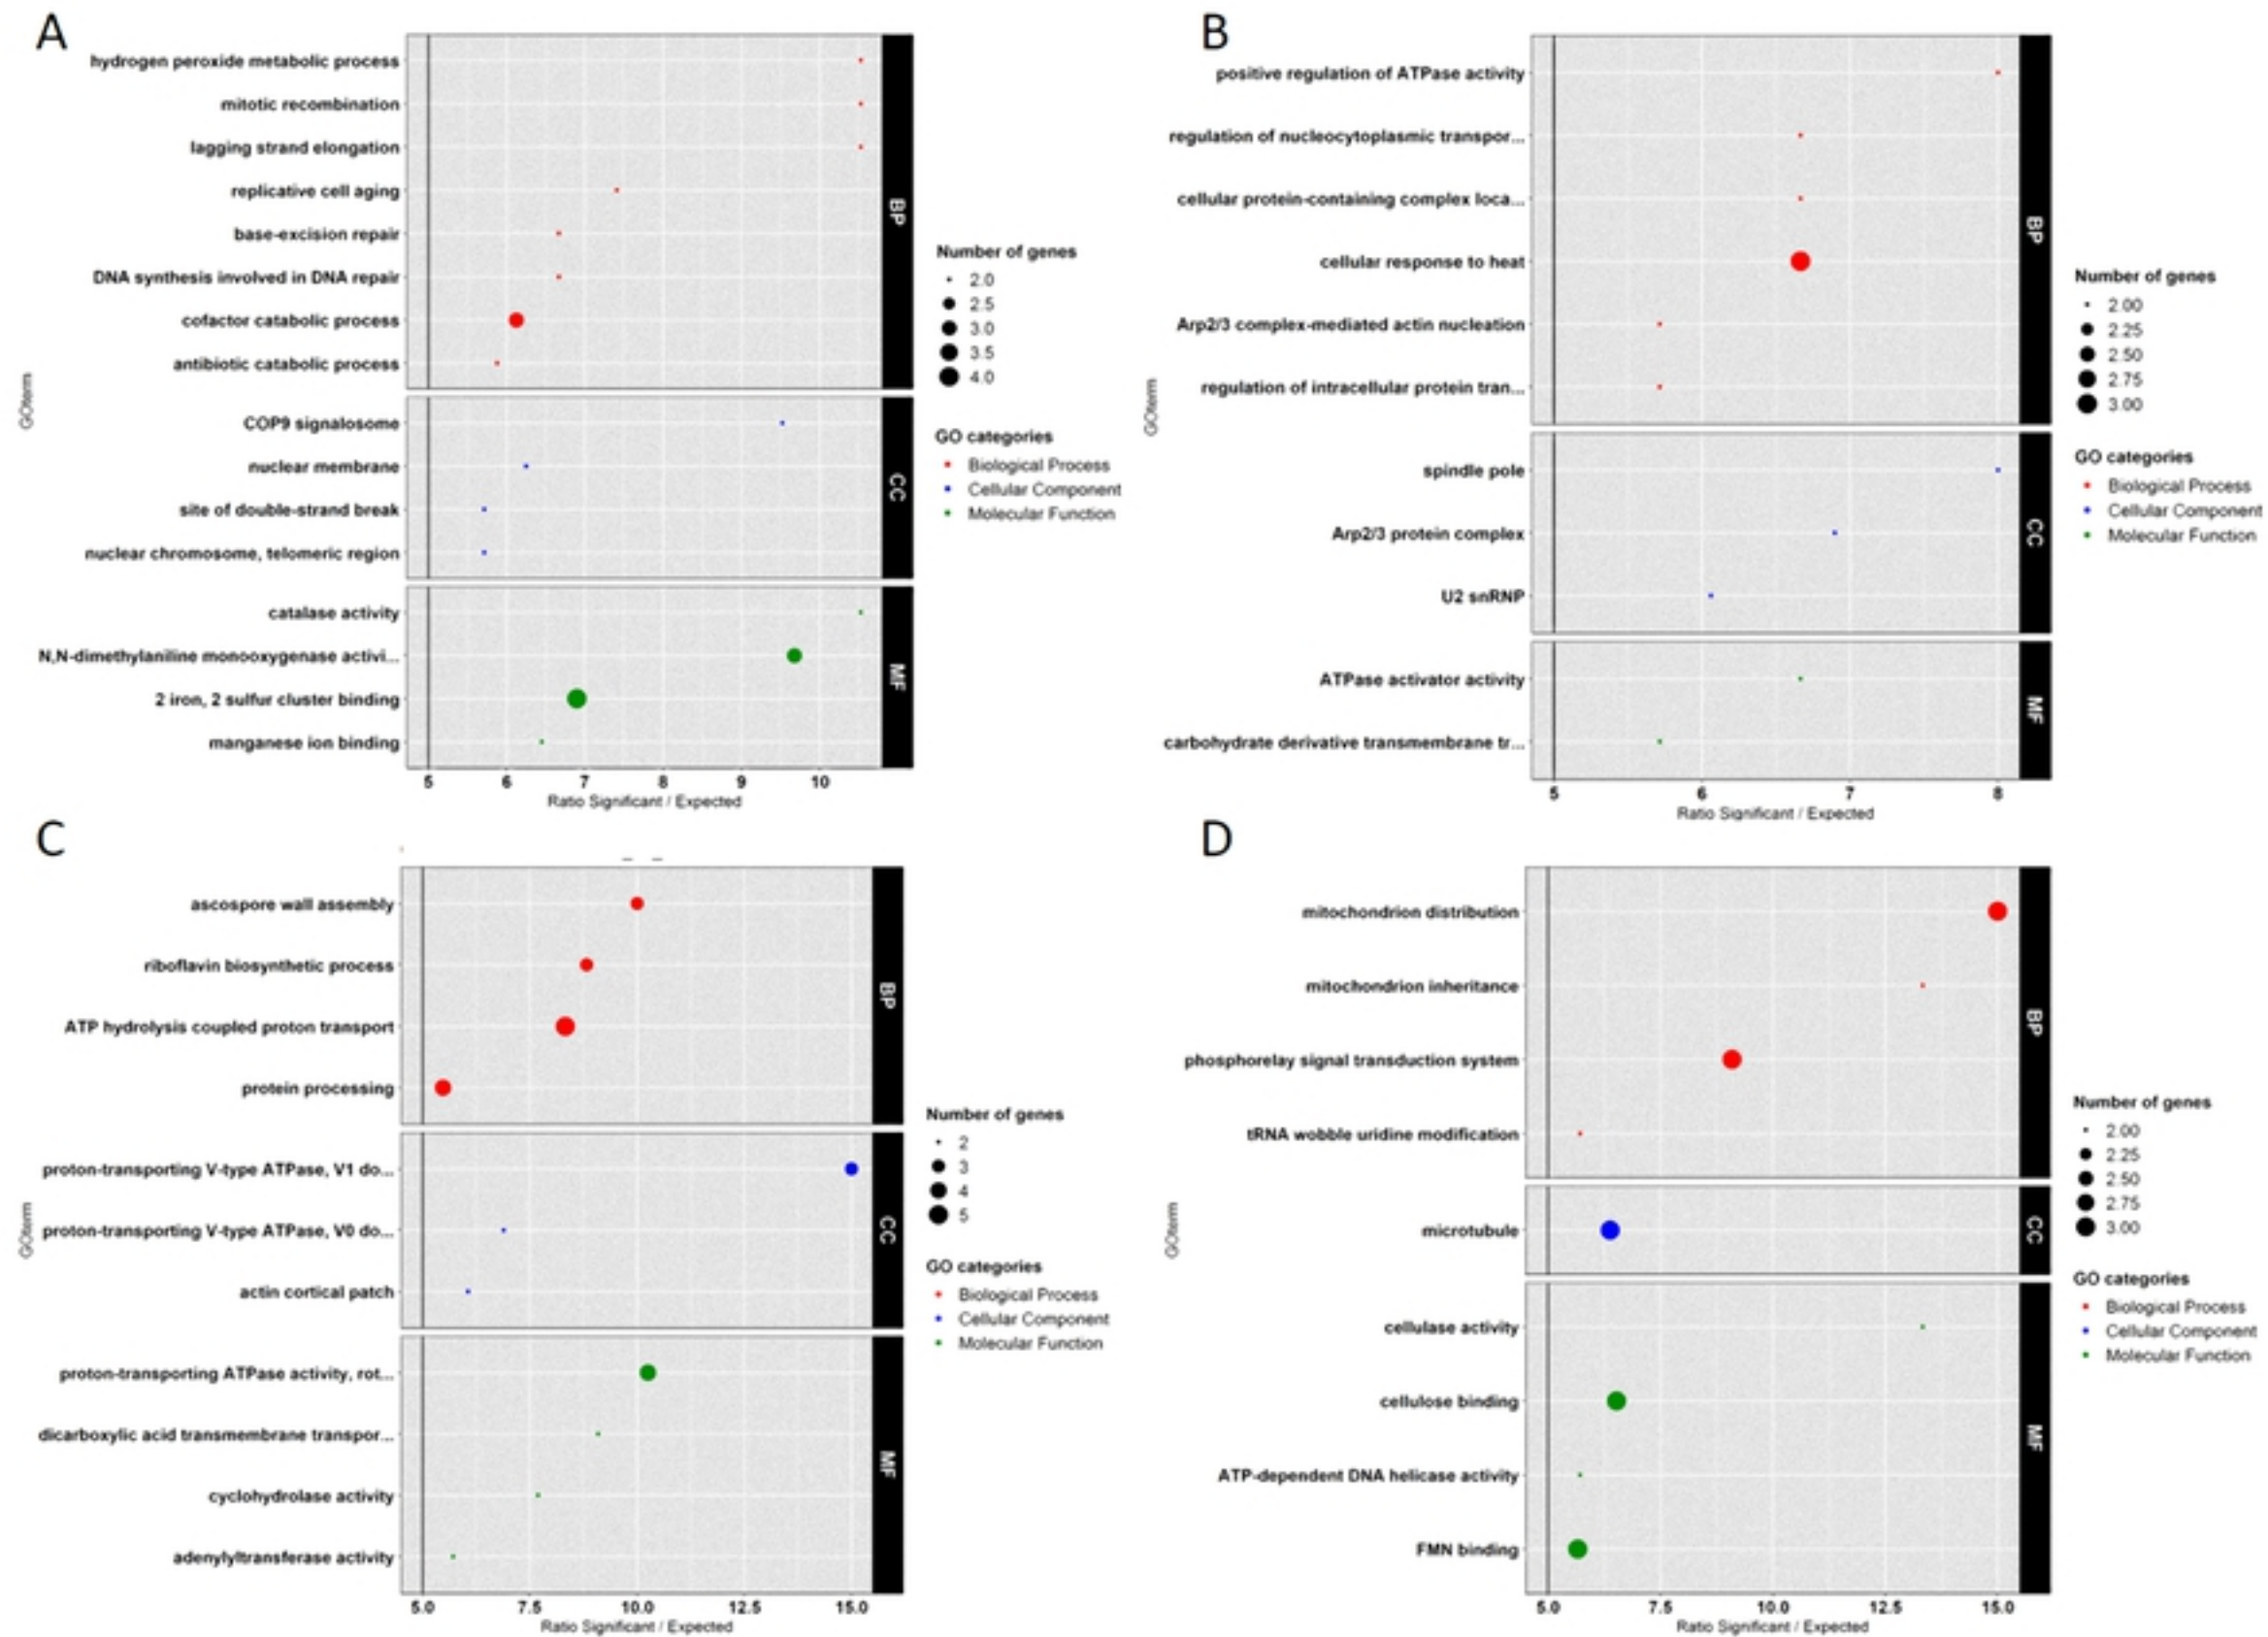

Fig6

A

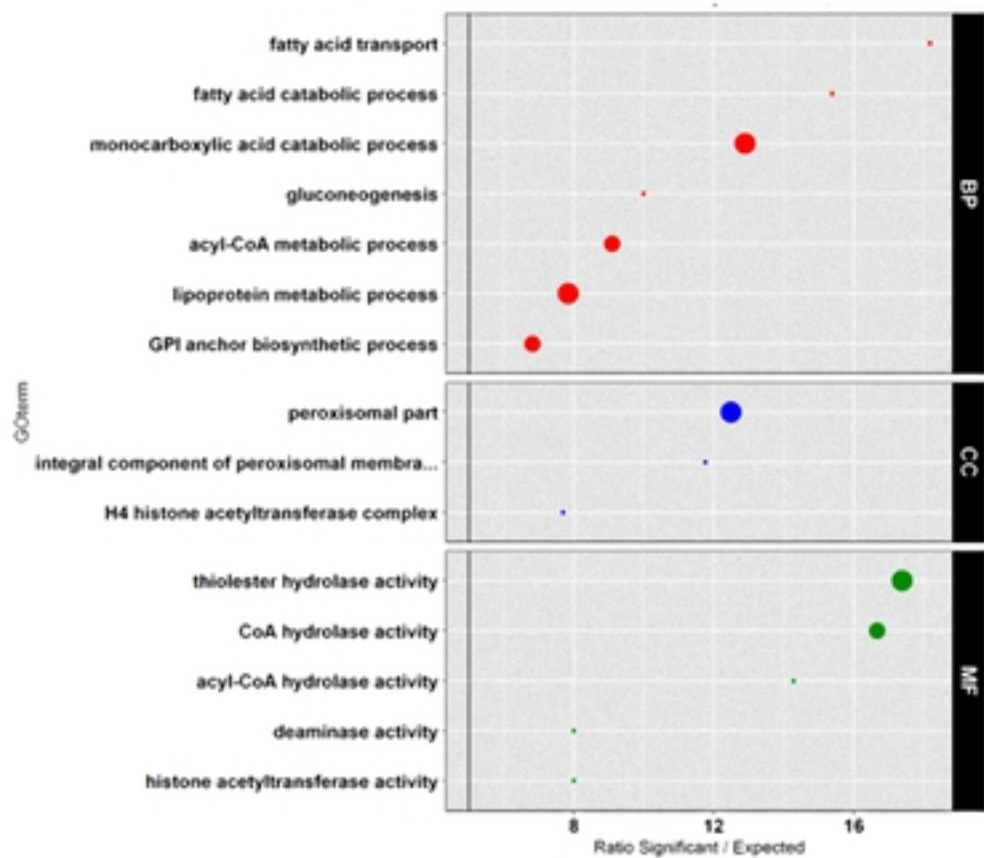

B

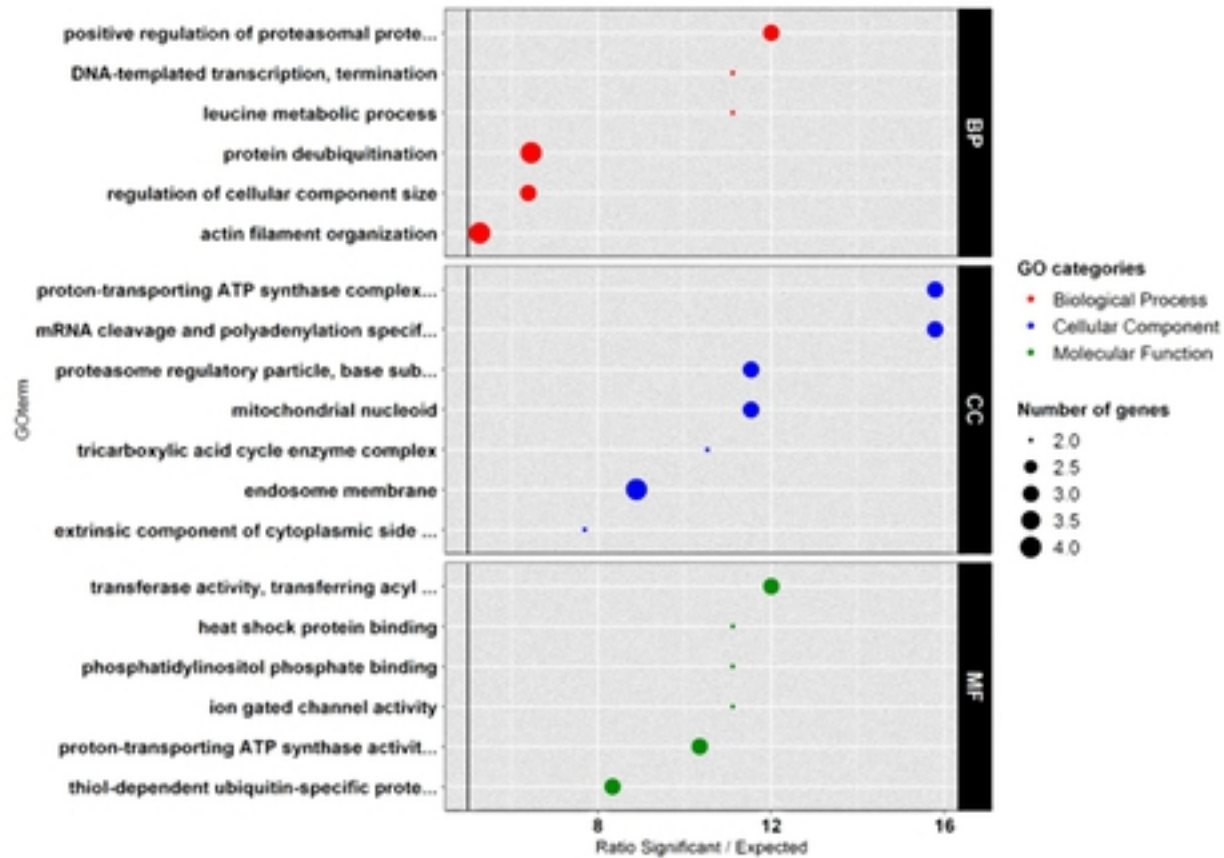

Fig7

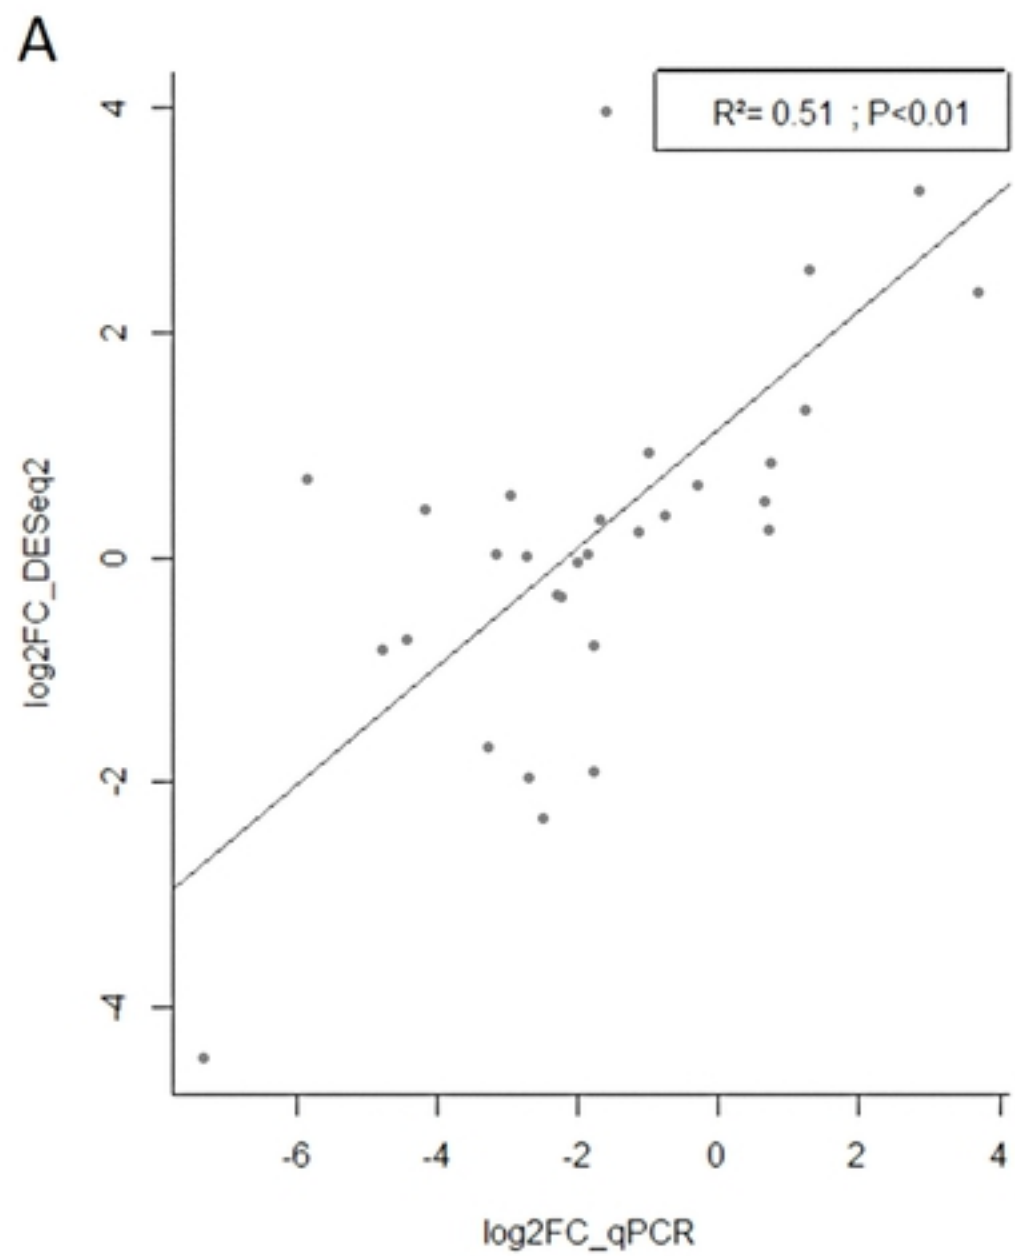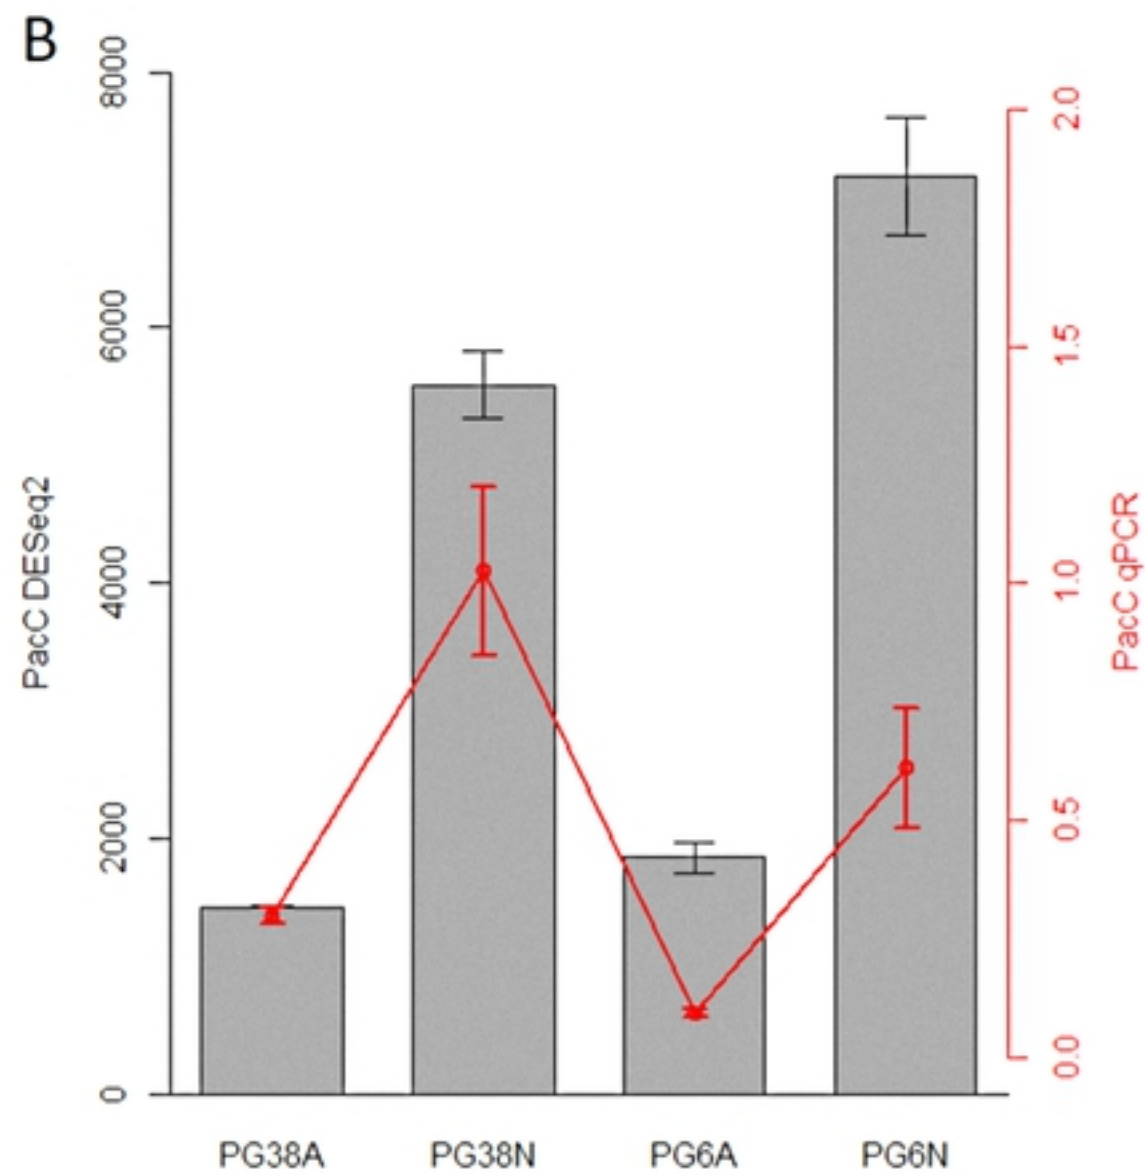

Fig8
